# Supplementary material for: Transcriptome and metabolome analyses reveal that Bacillus subtilis BS-Z15 lipopeptides mycosubtilin homologue mediates plant defense responses
Source: Front Plant Sci. 2023 Feb 6;13:1088220. doi: 10.3389/fpls.2022.1088220 (PMC9940755; doi:10.3389/fpls.2022.1088220)
Supplement: Supplementary file 3 [file Table_1.xls]

## Sheet: Supplementary Table 1
Fluorescent quantitative PCR primer sequences（Sangon Biotech）
Primer name	sequences (5'→3')
AtPR1F	CCTGGGGTAGCGGTGACTT
AtPR1R	CGTGTTCGCAGCGTAGTTGT
AtPDF1.2F	TCACCCTTATCTTCGCTGCTC
AtPDF1.2R	ACCATGTCCCACTTGGCTTC
AtACTINF	GCCGACAGAATGAGCAAAGAG
AtACTINR	AGGTACTGAGGGAGGCCAAGA
AtPR5F	CCTGCAAGAGTGCCTGTGAGA
AtPR5R	AGGTGCTCGTTTCGTCGTCAT
AtNPR1F	ATGATTTCTACAGCGACGCTAA
AtNPR1R	GACTTCGTAATCCTTGGCAATC
AtWRKY33F	CTATTGCTGGTCACTCCAACTA
AtWRKY33R	CGAATCGAAAAATGAGGTCTCC
AtLOX1F	TGAGCTTGGTCTAGGGCTGA
AtLOX1R	GCAGAATCAGCAGCACGTTT
AtIAA13F	CCGACTTTAATCGCCACACC
AtIAA13R	TCGTCGTCGTCTCATTTCCG
