# Supplementary material for: Transcriptome and metabolome analyses reveal that Bacillus subtilis BS-Z15 lipopeptides mycosubtilin homologue mediates plant defense responses
Source: Front Plant Sci. 2023 Feb 6;13:1088220. doi: 10.3389/fpls.2022.1088220 (PMC9940755; doi:10.3389/fpls.2022.1088220)
Supplement: Supplementary file 4 [file Table_2.xlsx]

## Sheet: Supplementary Table 2
Sequencing sample quality control
Film Chart No.	Sample name	Sample type	Concentration（ng/uL）	Total（ug）	OD260/OD280	OD 260/OD 230	RIN
1	A-1	Arabidopsis seedlings	1398.5	34.96	2.19	2.39	8.1
2	A-2	Arabidopsis seedlings	1231.7	30.79	2.21	2.31	8.3
3	A-3	Arabidopsis seedlings	1214.6	30.36	2.24	2.32	8.5
4	B-1	Arabidopsis seedlings	1930.2	48.26	2.16	2.35	7.8
5	B-2	Arabidopsis seedlings	1033.3	25.83	2.22	2.28	7.9
6	B-3	Arabidopsis seedlings	865.5	21.64	2.26	1.77	8.7
