# Supplementary material for: Transcriptome and metabolome analyses reveal that Bacillus subtilis BS-Z15 lipopeptides mycosubtilin homologue mediates plant defense responses
Source: Front Plant Sci. 2023 Feb 6;13:1088220. doi: 10.3389/fpls.2022.1088220 (PMC9940755; doi:10.3389/fpls.2022.1088220)
Supplement: Supplementary file 5 [file Table_3.xls]

## Sheet: Supplementary Table 3
Sample	Raw reads	Raw bases	Clean reads	Clean bases	Error rate(%)	Q20(%)	Q30(%)	GC content(%)
A_1	47908424	7234172024	47517674	7089636146	0.0238	98.55	95.32	46.68
A_2	43254608	6531445808	42930202	6410753045	0.0241	98.44	95	46.81
A_3	45633308	6890629508	45282006	6751235481	0.0239	98.5	95.18	46.66
B_1	52141164	7873315764	51745836	7668589439	0.024	98.46	95.07	45.54
B_2	45985172	6943760972	45632944	6789354021	0.024	98.47	95.09	45.36
B_3	47968686	7243271586	47572334	7064884767	0.0242	98.4	94.93	45.81
