# Supplementary material for: Transcriptome and metabolome analyses reveal that Bacillus subtilis BS-Z15 lipopeptides mycosubtilin homologue mediates plant defense responses
Source: Front Plant Sci. 2023 Feb 6;13:1088220. doi: 10.3389/fpls.2022.1088220 (PMC9940755; doi:10.3389/fpls.2022.1088220)
Supplement: Supplementary file 6 [file Table_4.xls]

## Sheet: Supplementary Table 4
Category	Type	Functional description	A_vs_B_G_COG
INFORMATION STORAGE AND PROCESSING	A	RNA processing and modification	30
INFORMATION STORAGE AND PROCESSING	B	Chromatin structure and dynamics	28
METABOLISM	C	Energy production and conversion	85
CELLULAR PROCESSES AND SIGNALING	D	Cell cycle control, cell division, chromosome partitioning	65
METABOLISM	E	Amino acid transport and metabolism	134
METABOLISM	F	Nucleotide transport and metabolism	39
METABOLISM	G	Carbohydrate transport and metabolism	271
METABOLISM	H	Coenzyme transport and metabolism	56
METABOLISM	I	Lipid transport and metabolism	115
INFORMATION STORAGE AND PROCESSING	J	Translation, ribosomal structure and biogenesis	134
INFORMATION STORAGE AND PROCESSING	K	Transcription	499
INFORMATION STORAGE AND PROCESSING	L	Replication, recombination and repair	70
CELLULAR PROCESSES AND SIGNALING	M	Cell wall/membrane/envelope biogenesis	73
CELLULAR PROCESSES AND SIGNALING	N	Cell motility	1
CELLULAR PROCESSES AND SIGNALING	O	Posttranslational modification, protein turnover, chaperones	386
METABOLISM	P	Inorganic ion transport and metabolism	111
METABOLISM	Q	Secondary metabolites biosynthesis, transport and catabolism	105
POORLY CHARACTERIZED	S	Function unknown	3659
CELLULAR PROCESSES AND SIGNALING	T	Signal transduction mechanisms	402
CELLULAR PROCESSES AND SIGNALING	U	Intracellular trafficking, secretion, and vesicular transport	264
CELLULAR PROCESSES AND SIGNALING	V	Defense mechanisms	59
CELLULAR PROCESSES AND SIGNALING	Y	Nuclear structure	1
CELLULAR PROCESSES AND SIGNALING	Z	Cytoskeleton	62
