# Supplementary material for: Transcriptome and metabolome analyses reveal that Bacillus subtilis BS-Z15 lipopeptides mycosubtilin homologue mediates plant defense responses
Source: Front Plant Sci. 2023 Feb 6;13:1088220. doi: 10.3389/fpls.2022.1088220 (PMC9940755; doi:10.3389/fpls.2022.1088220)
Supplement: Supplementary file 7 [file Table_5.xls]

## Sheet: Supplementary Table 5
GO ID	Description	Term Type	A_vs_B_G num	A_vs_B_G percent
GO:0032501	multicellular organismal process	biological_process	432	432/6708
GO:0071840	cellular component organization or biogenesis	biological_process	726	726/6708
GO:0065007	biological regulation	biological_process	1986	1986/6708
GO:0051704	multi-organism process	biological_process	634	634/6708
GO:0048511	rhythmic process	biological_process	59	59/6708
GO:0022414	reproductive process	biological_process	409	409/6708
GO:0040011	locomotion	biological_process	11	11/6708
GO:0098754	detoxification	biological_process	112	112/6708
GO:0002376	immune system process	biological_process	243	243/6708
GO:0000003	reproduction	biological_process	9	9/6708
GO:0007610	behavior	biological_process	1	1/6708
GO:0050896	response to stimulus	biological_process	2068	2068/6708
GO:0009987	cellular process	biological_process	3508	3508/6708
GO:0022610	biological adhesion	biological_process	4	4/6708
GO:0015976	carbon utilization	biological_process	3	3/6708
GO:0001906	cell killing	biological_process	37	37/6708
GO:0051179	localization	biological_process	730	730/6708
GO:0032502	developmental process	biological_process	724	724/6708
GO:0019740	nitrogen utilization	biological_process	1	1/6708
GO:0043473	pigmentation	biological_process	1	1/6708
GO:0008152	metabolic process	biological_process	2906	2906/6708
GO:0023052	signaling	biological_process	19	19/6708
GO:0008283	cell population proliferation	biological_process	13	13/6708
GO:0040007	growth	biological_process	101	101/6708
GO:0044425	membrane part	cellular_component	2457	2457/6708
GO:0005623	cell	cellular_component	124	124/6708
GO:0044422	organelle part	cellular_component	1221	1221/6708
GO:0032991	protein-containing complex	cellular_component	518	518/6708
GO:0044464	cell part	cellular_component	4381	4381/6708
GO:0016020	membrane	cellular_component	2636	2636/6708
GO:0044217	other organism part	cellular_component	1	1/6708
GO:0043226	organelle	cellular_component	2943	2943/6708
GO:0009295	nucleoid	cellular_component	28	28/6708
GO:0099080	supramolecular complex	cellular_component	97	97/6708
GO:0031974	membrane-enclosed lumen	cellular_component	31	31/6708
GO:0005576	extracellular region	cellular_component	569	569/6708
GO:0044421	extracellular region part	cellular_component	80	80/6708
GO:0030054	cell junction	cellular_component	329	329/6708
GO:0031386	protein tag	molecular_function	3	3/6708
GO:0090729	toxin activity	molecular_function	4	4/6708
GO:0005215	transporter activity	molecular_function	431	431/6708
GO:0005488	binding	molecular_function	3616	3616/6708
GO:0003824	catalytic activity	molecular_function	2906	2906/6708
GO:0140104	molecular carrier activity	molecular_function	4	4/6708
GO:0005198	structural molecule activity	molecular_function	100	100/6708
GO:0098772	molecular function regulator	molecular_function	170	170/6708
GO:0045735	nutrient reservoir activity	molecular_function	22	22/6708
GO:0016209	antioxidant activity	molecular_function	76	76/6708
GO:0045182	translation regulator activity	molecular_function	25	25/6708
GO:0060089	molecular transducer activity	molecular_function	137	137/6708
GO:0140110	transcription regulator activity	molecular_function	507	507/6708
GO:0140299	small molecule sensor activity	molecular_function	8	8/6708
GO:0044183	protein folding chaperone	molecular_function	9	9/6708
