# Supplementary material for: Transcriptome and metabolome analyses reveal that Bacillus subtilis BS-Z15 lipopeptides mycosubtilin homologue mediates plant defense responses
Source: Front Plant Sci. 2023 Feb 6;13:1088220. doi: 10.3389/fpls.2022.1088220 (PMC9940755; doi:10.3389/fpls.2022.1088220)
Supplement: Supplementary file 8 [file Table_6.xls]

## Sheet: Supplementary Table 6
First Category	Second Category	pathway ID	Description	A_vs_B_G_up numbers	A_vs_B_G_down numbers
Metabolism	Amino acid metabolism	map00310	Lysine degradation	3	1
Metabolism	Amino acid metabolism	map00260	Glycine, serine and threonine metabolism	11	8
Metabolism	Amino acid metabolism	map00250	Alanine, aspartate and glutamate metabolism	10	8
Metabolism	Lipid metabolism	map00061	Fatty acid biosynthesis	7	7
Metabolism	Lipid metabolism	map00062	Fatty acid elongation	1	7
Metabolism	Metabolism of other amino acids	map00410	beta-Alanine metabolism	8	2
Metabolism	Carbohydrate metabolism	map00650	Butanoate metabolism	3	3
Metabolism	Metabolism of cofactors and vitamins	map00860	Porphyrin and chlorophyll metabolism	9	16
Metabolism	Energy metabolism	map00710	Carbon fixation in photosynthetic organisms	8	8
Metabolism	Biosynthesis of other secondary metabolites	map00942	Anthocyanin biosynthesis	1	0
Metabolism	Biosynthesis of other secondary metabolites	map00941	Flavonoid biosynthesis	9	0
Metabolism	Biosynthesis of other secondary metabolites	map00940	Phenylpropanoid biosynthesis	64	23
Metabolism	Biosynthesis of other secondary metabolites	map00945	Stilbenoid, diarylheptanoid and gingerol biosynthesis	5	0
Metabolism	Biosynthesis of other secondary metabolites	map00944	Flavone and flavonol biosynthesis	3	0
Metabolism	Amino acid metabolism	map00300	Lysine biosynthesis	2	3
Metabolism	Metabolism of cofactors and vitamins	map00780	Biotin metabolism	2	4
Metabolism	Metabolism of cofactors and vitamins	map00785	Lipoic acid metabolism	0	1
Metabolism	Lipid metabolism	map00073	Cutin, suberine and wax biosynthesis	1	7
Metabolism	Lipid metabolism	map00071	Fatty acid degradation	9	1
Metabolism	Biosynthesis of other secondary metabolites	map00261	Monobactam biosynthesis	2	2
Metabolism	Amino acid metabolism	map00380	Tryptophan metabolism	19	9
Metabolism	Metabolism of other amino acids	map00460	Cyanoamino acid metabolism	21	7
Metabolism	Amino acid metabolism	map00290	Valine, leucine and isoleucine biosynthesis	2	3
Metabolism	Amino acid metabolism	map00270	Cysteine and methionine metabolism	31	13
Metabolism	Carbohydrate metabolism	map00040	Pentose and glucuronate interconversions	16	18
Metabolism	Metabolism of cofactors and vitamins	map00670	One carbon pool by folate	1	0
Metabolism	Metabolism of cofactors and vitamins	map00770	Pantothenate and CoA biosynthesis	5	2
Metabolism	Biosynthesis of other secondary metabolites	map00960	Tropane, piperidine and pyridine alkaloid biosynthesis	11	6
Metabolism	Metabolism of cofactors and vitamins	map00790	Folate biosynthesis	7	3
Metabolism	Biosynthesis of other secondary metabolites	map00965	Betalain biosynthesis	0	1
Metabolism	Biosynthesis of other secondary metabolites	map00966	Glucosinolate biosynthesis	10	5
Metabolism	Lipid metabolism	map00565	Ether lipid metabolism	5	1
Metabolism	Lipid metabolism	map00564	Glycerophospholipid metabolism	17	10
Metabolism	Lipid metabolism	map00561	Glycerolipid metabolism	16	6
Metabolism	Glycan biosynthesis and metabolism	map00563	Glycosylphosphatidylinositol (GPI)-anchor biosynthesis	0	1
Metabolism	Carbohydrate metabolism	map00562	Inositol phosphate metabolism	16	0
Metabolism	Carbohydrate metabolism	map00051	Fructose and mannose metabolism	5	9
Metabolism	Carbohydrate metabolism	map00053	Ascorbate and aldarate metabolism	10	6
Metabolism	Carbohydrate metabolism	map00052	Galactose metabolism	5	8
Metabolism	Amino acid metabolism	map00280	Valine, leucine and isoleucine degradation	5	7
Metabolism	Metabolism of cofactors and vitamins	map00760	Nicotinate and nicotinamide metabolism	4	1
Metabolism	Lipid metabolism	map00600	Sphingolipid metabolism	7	3
Metabolism	Glycan biosynthesis and metabolism	map00601	Glycosphingolipid biosynthesis - lacto and neolacto series	1	1
Metabolism	Glycan biosynthesis and metabolism	map00603	Glycosphingolipid biosynthesis - globo and isoglobo series	1	2
Metabolism	Energy metabolism	map00910	Nitrogen metabolism	10	7
Metabolism	Metabolism of other amino acids	map00440	Phosphonate and phosphinate metabolism	0	1
Metabolism	Amino acid metabolism	map00360	Phenylalanine metabolism	10	5
Metabolism	Lipid metabolism	map00591	Linoleic acid metabolism	4	2
Metabolism	Metabolism of terpenoids and polyketides	map00905	Brassinosteroid biosynthesis	0	1
Metabolism	Glycan biosynthesis and metabolism	map00510	N-Glycan biosynthesis	5	0
Metabolism	Glycan biosynthesis and metabolism	map00511	Other glycan degradation	2	2
Metabolism	Glycan biosynthesis and metabolism	map00513	Various types of N-glycan biosynthesis	0	2
Metabolism	Glycan biosynthesis and metabolism	map00514	Other types of O-glycan biosynthesis	5	0
Metabolism	Amino acid metabolism	map00350	Tyrosine metabolism	13	4
Metabolism	Lipid metabolism	map00100	Steroid biosynthesis	5	6
Metabolism	Carbohydrate metabolism	map00020	Citrate cycle (TCA cycle)	5	4
Metabolism	Metabolism of cofactors and vitamins	map00750	Vitamin B6 metabolism	3	2
Metabolism	Metabolism of other amino acids	map00450	Selenocompound metabolism	4	0
Metabolism	Metabolism of terpenoids and polyketides	map00909	Sesquiterpenoid and triterpenoid biosynthesis	6	7
Metabolism	Metabolism of terpenoids and polyketides	map00908	Zeatin biosynthesis	14	4
Metabolism	Lipid metabolism	map00590	Arachidonic acid metabolism	5	2
Metabolism	Metabolism of terpenoids and polyketides	map00906	Carotenoid biosynthesis	8	4
Metabolism	Lipid metabolism	map00592	alpha-Linolenic acid metabolism	8	4
Metabolism	Metabolism of terpenoids and polyketides	map00904	Diterpenoid biosynthesis	8	3
Metabolism	Metabolism of terpenoids and polyketides	map00902	Monoterpenoid biosynthesis	1	0
Metabolism	Biosynthesis of other secondary metabolites	map00901	Indole alkaloid biosynthesis	2	1
Metabolism	Metabolism of terpenoids and polyketides	map00900	Terpenoid backbone biosynthesis	6	11
Metabolism	Energy metabolism	map00195	Photosynthesis	2	26
Metabolism	Energy metabolism	map00196	Photosynthesis - antenna proteins	2	17
Metabolism	Energy metabolism	map00190	Oxidative phosphorylation	6	3
Metabolism	Amino acid metabolism	map00220	Arginine biosynthesis	7	4
Metabolism	Amino acid metabolism	map00340	Histidine metabolism	1	2
Metabolism	Metabolism of cofactors and vitamins	map00130	Ubiquinone and other terpenoid-quinone biosynthesis	13	1
Metabolism	Carbohydrate metabolism	map00500	Starch and sucrose metabolism	34	30
Metabolism	Carbohydrate metabolism	map00030	Pentose phosphate pathway	6	6
Metabolism	Metabolism of cofactors and vitamins	map00740	Riboflavin metabolism	3	5
Metabolism	Carbohydrate metabolism	map00620	Pyruvate metabolism	9	12
Metabolism	Nucleotide metabolism	map00230	Purine metabolism	16	10
Metabolism	Biosynthesis of other secondary metabolites	map00232	Caffeine metabolism	0	1
Metabolism	Glycan biosynthesis and metabolism	map00604	Glycosphingolipid biosynthesis - ganglio series	0	1
Metabolism	Amino acid metabolism	map00330	Arginine and proline metabolism	11	7
Metabolism	Glycan biosynthesis and metabolism	map00531	Glycosaminoglycan degradation	0	2
Metabolism	Carbohydrate metabolism	map00630	Glyoxylate and dicarboxylate metabolism	8	8
Metabolism	Energy metabolism	map00920	Sulfur metabolism	15	1
Metabolism	Metabolism of other amino acids	map00430	Taurine and hypotaurine metabolism	4	0
Metabolism	Metabolism of cofactors and vitamins	map00730	Thiamine metabolism	4	3
Metabolism	Lipid metabolism	map01040	Biosynthesis of unsaturated fatty acids	3	4
Metabolism	Metabolism of other amino acids	map00480	Glutathione metabolism	32	10
Metabolism	Carbohydrate metabolism	map00520	Amino sugar and nucleotide sugar metabolism	25	11
Metabolism	Nucleotide metabolism	map00240	Pyrimidine metabolism	1	9
Metabolism	Carbohydrate metabolism	map00010	Glycolysis / Gluconeogenesis	15	14
Metabolism	Amino acid metabolism	map00400	Phenylalanine, tyrosine and tryptophan biosynthesis	22	1
Metabolism	Carbohydrate metabolism	map00640	Propanoate metabolism	6	2
Metabolism	Biosynthesis of other secondary metabolites	map00950	Isoquinoline alkaloid biosynthesis	6	3
Genetic Information Processing	Folding, sorting and degradation	map04130	SNARE interactions in vesicular transport	8	1
Genetic Information Processing	Transcription	map03040	Spliceosome	6	4
Genetic Information Processing	Translation	map00970	Aminoacyl-tRNA biosynthesis	1	2
Genetic Information Processing	Folding, sorting and degradation	map03060	Protein export	5	2
Genetic Information Processing	Replication and repair	map03410	Base excision repair	2	5
Genetic Information Processing	Folding, sorting and degradation	map04120	Ubiquitin mediated proteolysis	8	9
Genetic Information Processing	Folding, sorting and degradation	map04122	Sulfur relay system	1	0
Genetic Information Processing	Translation	map03010	Ribosome	4	22
Genetic Information Processing	Translation	map03013	RNA transport	4	6
Genetic Information Processing	Translation	map03015	mRNA surveillance pathway	12	5
Genetic Information Processing	Folding, sorting and degradation	map03018	RNA degradation	8	8
Genetic Information Processing	Replication and repair	map03430	Mismatch repair	1	6
Genetic Information Processing	Translation	map03008	Ribosome biogenesis in eukaryotes	4	1
Genetic Information Processing	Transcription	map03020	RNA polymerase	0	3
Genetic Information Processing	Folding, sorting and degradation	map04141	Protein processing in endoplasmic reticulum	28	12
Genetic Information Processing	Replication and repair	map03420	Nucleotide excision repair	2	6
Genetic Information Processing	Replication and repair	map03030	DNA replication	1	8
Genetic Information Processing	Transcription	map03022	Basal transcription factors	3	1
Genetic Information Processing	Folding, sorting and degradation	map03050	Proteasome	2	0
Genetic Information Processing	Replication and repair	map03440	Homologous recombination	2	11
Environmental Information Processing	Signal transduction	map04016	MAPK signaling pathway - plant	67	17
Environmental Information Processing	Signal transduction	map04070	Phosphatidylinositol signaling system	22	2
Environmental Information Processing	Membrane transport	map02010	ABC transporters	12	5
Environmental Information Processing	Signal transduction	map04075	Plant hormone signal transduction	63	39
Cellular Processes	Transport and catabolism	map04136	Autophagy - other	1	0
Cellular Processes	Transport and catabolism	map04145	Phagosome	5	17
Cellular Processes	Transport and catabolism	map04144	Endocytosis	20	11
Cellular Processes	Transport and catabolism	map04146	Peroxisome	13	9
Organismal Systems	Environmental adaptation	map04626	Plant-pathogen interaction	98	17
Organismal Systems	Environmental adaptation	map04712	Circadian rhythm - plant	12	5
Human Diseases	Drug resistance: antimicrobial	map01502	Vancomycin resistance	1	1
Human Diseases	Endocrine and metabolic disease	map04933	AGE-RAGE signaling pathway in diabetic complications	2	2
