# Supplementary material for: Transcriptome and metabolome analyses reveal that Bacillus subtilis BS-Z15 lipopeptides mycosubtilin homologue mediates plant defense responses
Source: Front Plant Sci. 2023 Feb 6;13:1088220. doi: 10.3389/fpls.2022.1088220 (PMC9940755; doi:10.3389/fpls.2022.1088220)
Supplement: Supplementary file 9 [file Table_7.xls]

## Sheet: Supplementary Table 7
Number	GO ID	Term Type	Description	Ratio_in_study	Ratio_in_pop	Pvalue	Padjust
13	GO:0010200	BP	response to chitin	13/45	156/28034	3.02672e-12	1.08101e-08
17	GO:0042742	BP	defense response to bacterium	17/45	476/28034	8.66238e-12	1.08101e-08
18	GO:0009607	BP	response to biotic stimulus	18/45	1574/28034	1.12077e-11	1.08101e-08
33	GO:0046483	BP	heterocycle metabolic process	33/45	3676/28034	1.78445e-11	1.08101e-08
45	GO:0031326	BP	regulation of cellular biosynthetic process	45/45	3013/28034	1.87532e-11	1.08101e-08
18	GO:0051704	BP	multi-organism process	18/45	1624/28034	1.88117e-11	1.08101e-08
33	GO:0016070	BP	RNA metabolic process	33/45	2132/28034	1.9044e-11	1.08101e-08
33	GO:0034645	BP	cellular macromolecule biosynthetic process	33/45	1626/28034	1.91984e-11	1.08101e-08
45	GO:0019222	BP	regulation of metabolic process	45/45	4061/28034	2.05119e-11	1.08101e-08
33	GO:0019438	BP	aromatic compound biosynthetic process	33/45	1409/28034	2.18802e-11	1.08101e-08
45	GO:0031323	BP	regulation of cellular metabolic process	45/45	3711/28034	2.20213e-11	1.08101e-08
33	GO:0009058	BP	biosynthetic process	33/45	3714/28034	2.24195e-11	1.08101e-08
45	GO:0009889	BP	regulation of biosynthetic process	45/45	3043/28034	2.29892e-11	1.08101e-08
33	GO:0032774	BP	RNA biosynthetic process	33/45	662/28034	2.30442e-11	1.08101e-08
19	GO:1901700	BP	response to oxygen-containing compound	19/45	1645/28034	2.32606e-11	1.08101e-08
13	GO:1901698	BP	response to nitrogen compound	13/45	396/28034	2.56824e-11	1.08101e-08
33	GO:0044249	BP	cellular biosynthetic process	33/45	3392/28034	2.60437e-11	1.08101e-08
45	GO:0065007	BP	biological regulation	45/45	7709/28034	2.7763e-11	1.08101e-08
18	GO:0098542	BP	defense response to other organism	18/45	1216/28034	2.80619e-11	1.08101e-08
45	GO:0005634	CC	nucleus	45/45	6107/28034	1.76487e-11	1.08101e-08
45	GO:0003700	MF	DNA-binding transcription factor activity	45/45	1815/28034	1.12993e-11	1.08101e-08
27	GO:0044212	MF	transcription regulatory region DNA binding	27/45	960/28034	1.23687e-11	1.08101e-08
27	GO:0001067	MF	regulatory region nucleic acid binding	27/45	960/28034	1.23687e-11	1.08101e-08
45	GO:0043565	MF	sequence-specific DNA binding	45/45	1159/28034	1.37213e-11	1.08101e-08
45	GO:1901363	MF	heterocyclic compound binding	45/45	8670/28034	1.53219e-11	1.08101e-08
45	GO:0097159	MF	organic cyclic compound binding	45/45	8695/28034	1.68107e-11	1.08101e-08
45	GO:0003676	MF	nucleic acid binding	45/45	4882/28034	2.57555e-11	1.08101e-08
45	GO:0051252	BP	regulation of RNA metabolic process	45/45	2764/28034	2.92746e-11	1.08745e-08
45	GO:0060255	BP	regulation of macromolecule metabolic process	45/45	3779/28034	3.29225e-11	1.14862e-08
33	GO:0044260	BP	cellular macromolecule metabolic process	33/45	5792/28034	3.32882e-11	1.14862e-08
33	GO:0006351	BP	transcription, DNA-templated	33/45	536/28034	3.42343e-11	1.14862e-08
45	GO:0050789	BP	regulation of biological process	45/45	6763/28034	3.81997e-11	1.1941e-08
33	GO:0090304	BP	nucleic acid metabolic process	33/45	2808/28034	3.99457e-11	1.1941e-08
33	GO:0044271	BP	cellular nitrogen compound biosynthetic process	33/45	1955/28034	4.09409e-11	1.1941e-08
33	GO:0097659	BP	nucleic acid-templated transcription	33/45	545/28034	4.14788e-11	1.1941e-08
33	GO:0006725	BP	cellular aromatic compound metabolic process	33/45	3826/28034	4.3261e-11	1.1941e-08
45	GO:0051171	BP	regulation of nitrogen compound metabolic process	45/45	3474/28034	4.33147e-11	1.1941e-08
21	GO:0006952	BP	defense response	21/45	1709/28034	4.36264e-11	1.1941e-08
45	GO:0019219	BP	regulation of nucleobase-containing compound metabolic process	45/45	2835/28034	4.8207e-11	1.20836e-08
45	GO:0043227	CC	membrane-bounded organelle	45/45	13009/28034	4.74121e-11	1.20836e-08
45	GO:0005488	MF	binding	45/45	15636/28034	4.85467e-11	1.20836e-08
45	GO:0140110	MF	transcription regulator activity	45/45	1975/28034	4.87944e-11	1.20836e-08
17	GO:0009617	BP	response to bacterium	17/45	555/28034	5.11392e-11	1.23697e-08
33	GO:1901576	BP	organic substance biosynthetic process	33/45	3512/28034	5.45744e-11	1.29007e-08
13	GO:0010243	BP	response to organonitrogen compound	13/45	312/28034	5.70698e-11	1.3042e-08
27	GO:0006950	BP	response to stress	27/45	4257/28034	6.04436e-11	1.3042e-08
45	GO:0010468	BP	regulation of gene expression	45/45	3196/28034	6.27488e-11	1.3042e-08
33	GO:0034654	BP	nucleobase-containing compound biosynthetic process	33/45	1081/28034	6.55592e-11	1.3042e-08
18	GO:0051707	BP	response to other organism	18/45	1512/28034	6.60136e-11	1.3042e-08
19	GO:0009605	BP	response to external stimulus	19/45	2010/28034	6.60213e-11	1.3042e-08
33	GO:0034641	BP	cellular nitrogen compound metabolic process	33/45	4274/28034	6.62016e-11	1.3042e-08
45	GO:2000112	BP	regulation of cellular macromolecule biosynthetic process	45/45	2887/28034	6.88447e-11	1.3042e-08
17	GO:0042493	BP	response to drug	17/45	570/28034	6.94904e-11	1.3042e-08
45	GO:0080090	BP	regulation of primary metabolic process	45/45	3554/28034	7.02194e-11	1.3042e-08
45	GO:0043231	CC	intracellular membrane-bounded organelle	45/45	12753/28034	6.20695e-11	1.3042e-08
45	GO:0003677	MF	DNA binding	45/45	2882/28034	6.65471e-11	1.3042e-08
45	GO:0010556	BP	regulation of macromolecule biosynthetic process	45/45	2909/28034	7.98709e-11	1.44325e-08
45	GO:0050794	BP	regulation of cellular process	45/45	5990/28034	8.04813e-11	1.44325e-08
33	GO:1901360	BP	organic cyclic compound metabolic process	33/45	3945/28034	8.49147e-11	1.49253e-08
18	GO:0043207	BP	response to external biotic stimulus	18/45	1538/28034	8.60991e-11	1.49253e-08
33	GO:1901362	BP	organic cyclic compound biosynthetic process	33/45	1540/28034	8.78584e-11	1.49806e-08
45	GO:0006355	BP	regulation of transcription, DNA-templated	45/45	2616/28034	8.93654e-11	1.49918e-08
45	GO:1903506	BP	regulation of nucleic acid-templated transcription	45/45	2629/28034	9.80645e-11	1.5937e-08
45	GO:2001141	BP	regulation of RNA biosynthetic process	45/45	2629/28034	9.80645e-11	1.5937e-08
45	GO:0043229	CC	intracellular organelle	45/45	13493/28034	1.00406e-10	1.60664e-08
33	GO:0009059	BP	macromolecule biosynthetic process	33/45	1801/28034	1.03054e-10	1.62403e-08
33	GO:0018130	BP	heterocycle biosynthetic process	33/45	1332/28034	1.0814e-10	1.65795e-08
33	GO:0006139	BP	nucleobase-containing compound metabolic process	33/45	3283/28034	1.08394e-10	1.65795e-08
45	GO:0043226	CC	organelle	45/45	13567/28034	1.12211e-10	1.69146e-08
45	GO:0044424	CC	intracellular part	45/45	16084/28034	1.37888e-10	2.04882e-08
33	GO:0043170	BP	macromolecule metabolic process	33/45	7680/28034	1.89874e-10	2.78152e-08
18	GO:0010033	BP	response to organic substance	18/45	1916/28034	2.82348e-10	4.02288e-08
8	GO:0009751	BP	response to salicylic acid	8/45	225/28034	2.53774e-09	3.5669e-07
33	GO:0006807	BP	nitrogen compound metabolic process	33/45	8478/28034	3.15645e-09	4.37737e-07
10	GO:0080134	BP	regulation of response to stress	10/45	486/28034	4.14396e-09	5.67123e-07
9	GO:0046677	BP	response to antibiotic	9/45	361/28034	5.19209e-09	7.01337e-07
5	GO:2000022	BP	regulation of jasmonic acid mediated signaling pathway	5/45	43/28034	7.793e-09	1.03917e-06
28	GO:0050896	BP	response to stimulus	28/45	6220/28034	8.81514e-09	1.14608e-06
45	GO:0044464	CC	cell part	45/45	18319/28034	8.75416e-09	1.14608e-06
12	GO:0048583	BP	regulation of response to stimulus	12/45	891/28034	1.0808e-08	1.38783e-06
8	GO:0014070	BP	response to organic cyclic compound	8/45	312/28034	3.2436e-08	4.11423e-06
19	GO:0042221	BP	response to chemical	19/45	2934/28034	3.70622e-08	4.64439e-06
8	GO:0031347	BP	regulation of defense response	8/45	336/28034	5.74154e-08	7.10925e-06
33	GO:0044238	BP	primary metabolic process	33/45	9855/28034	2.84362e-07	3.47959e-05
9	GO:0050832	BP	defense response to fungus	9/45	589/28034	3.38979e-07	4.09967e-05
12	GO:0001101	BP	response to acid chemical	12/45	1239/28034	3.91003e-07	4.6745e-05
3	GO:0070370	BP	cellular heat acclimation	3/45	10/28034	4.60138e-07	5.43852e-05
9	GO:0009620	BP	response to fungus	9/45	673/28034	1.02775e-06	0.000118774
33	GO:0044237	BP	cellular metabolic process	33/45	10370/28034	1.11347e-06	0.000127267
39	GO:0009987	BP	cellular process	39/45	14461/28034	1.30254e-06	0.000147257
33	GO:0071704	BP	organic substance metabolic process	33/45	10666/28034	1.7905e-06	0.000200248
3	GO:1900457	BP	regulation of brassinosteroid mediated signaling pathway	3/45	22/28034	5.82601e-06	0.000631212
6	GO:0045892	BP	negative regulation of transcription, DNA-templated	6/45	301/28034	8.34873e-06	0.000886073
6	GO:1903507	BP	negative regulation of nucleic acid-templated transcription	6/45	315/28034	1.08091e-05	0.00112426
6	GO:1902679	BP	negative regulation of RNA biosynthetic process	6/45	315/28034	1.08091e-05	0.00112426
6	GO:0051253	BP	negative regulation of RNA metabolic process	6/45	329/28034	1.38269e-05	0.0014239
5	GO:0000302	BP	response to reactive oxygen species	5/45	206/28034	1.96328e-05	0.00198254
6	GO:0045934	BP	negative regulation of nucleobase-containing compound metabolic process	6/45	360/28034	2.29612e-05	0.00229634
6	GO:2000113	BP	negative regulation of cellular macromolecule biosynthetic process	6/45	377/28034	2.97321e-05	0.00294518
6	GO:0010558	BP	negative regulation of macromolecule biosynthetic process	6/45	391/28034	3.64413e-05	0.00357571
4	GO:0010150	BP	leaf senescence	4/45	121/28034	4.29036e-05	0.00417047
3	GO:2000070	BP	regulation of response to water deprivation	3/45	44/28034	4.88812e-05	0.00470753
6	GO:0031327	BP	negative regulation of cellular biosynthetic process	6/45	416/28034	5.14188e-05	0.00490649
3	GO:0009863	BP	salicylic acid mediated signaling pathway	3/45	45/28034	5.2314e-05	0.00494652
4	GO:0090693	BP	plant organ senescence	4/45	129/28034	5.50826e-05	0.00516139
6	GO:0009890	BP	negative regulation of biosynthetic process	6/45	422/28034	5.56603e-05	0.00516895
33	GO:0008152	BP	metabolic process	33/45	12262/28034	6.71971e-05	0.00616936
3	GO:0047484	BP	regulation of response to osmotic stress	3/45	49/28034	6.76192e-05	0.00616936
25	GO:0005515	MF	protein binding	25/45	7686/28034	7.36469e-05	0.00666088
3	GO:0002237	BP	response to molecule of bacterial origin	3/45	52/28034	8.08382e-05	0.00724826
45	GO:0003674	MF	molecular_function	45/45	22649/28034	9.39278e-05	0.00834994
4	GO:0007568	BP	aging	4/45	149/28034	9.63865e-05	0.0084959
10	GO:0009725	BP	response to hormone	10/45	1500/28034	0.000106673	0.00932359
6	GO:0002376	BP	immune system process	6/45	482/28034	0.00011554	0.0100144
10	GO:0009719	BP	response to endogenous stimulus	10/45	1544/28034	0.00013538	0.0116371
8	GO:0009755	BP	hormone-mediated signaling pathway	8/45	987/28034	0.000155414	0.013169
12	GO:0007165	BP	signal transduction	12/45	2239/28034	0.000155734	0.013169
3	GO:0010286	BP	heat acclimation	3/45	65/28034	0.000157462	0.0132078
2	GO:1900056	BP	negative regulation of leaf senescence	2/45	13/28034	0.000194321	0.0161691
6	GO:0051172	BP	negative regulation of nitrogen compound metabolic process	6/45	546/28034	0.000226965	0.0187354
3	GO:0009867	BP	jasmonic acid mediated signaling pathway	3/45	74/28034	0.000231338	0.0189461
2	GO:1905622	BP	negative regulation of leaf development	2/45	15/28034	0.000261052	0.0211239
9	GO:0033554	BP	cellular response to stress	9/45	1371/28034	0.000280169	0.0224156
3	GO:0034605	BP	cellular response to heat	3/45	80/28034	0.000291241	0.0231236
6	GO:0010629	BP	negative regulation of gene expression	6/45	587/28034	0.000334328	0.0263435
5	GO:0009966	BP	regulation of signal transduction	5/45	382/28034	0.000357248	0.0279379
5	GO:0023051	BP	regulation of signaling	5/45	388/28034	0.000383615	0.0297759
6	GO:0031324	BP	negative regulation of cellular metabolic process	6/45	604/28034	0.000389089	0.0299771
5	GO:0010646	BP	regulation of cell communication	5/45	392/28034	0.000401994	0.0305192
45	GO:0005575	CC	cellular_component	45/45	23308/28034	0.00043918	0.0331008
3	GO:0042542	BP	response to hydrogen peroxide	3/45	96/28034	0.000497487	0.0364392
3	GO:0009742	BP	brassinosteroid mediated signaling pathway	3/45	96/28034	0.000497487	0.0364392
3	GO:0043401	BP	steroid hormone mediated signaling pathway	3/45	96/28034	0.000497487	0.0364392
2	GO:0009682	BP	induced systemic resistance	2/45	23/28034	0.000623892	0.0453783
4	GO:0005516	MF	calmodulin binding	4/45	268/28034	0.00089417	0.0645851
2	GO:0010104	BP	regulation of ethylene-activated signaling pathway	2/45	28/28034	0.000927393	0.0660672
2	GO:0070297	BP	regulation of phosphorelay signal transduction system	2/45	28/28034	0.000927393	0.0660672
6	GO:0010605	BP	negative regulation of macromolecule metabolic process	6/45	779/28034	0.00146075	0.101288
1	GO:0080169	BP	cellular response to boron-containing substance deprivation	1/45	1/28034	0.00160519	0.109744
1	GO:0010055	BP	atrichoblast differentiation	1/45	1/28034	0.00160519	0.109744
9	GO:0051716	BP	cellular response to stimulus	9/45	1750/28034	0.00161435	0.109744
5	GO:0006979	BP	response to oxidative stress	5/45	544/28034	0.00174011	0.117525
2	GO:0090333	BP	regulation of stomatal closure	2/45	41/28034	0.00198531	0.132367
2	GO:2000031	BP	regulation of salicylic acid mediated signaling pathway	2/45	42/28034	0.00208245	0.137959
6	GO:0009892	BP	negative regulation of metabolic process	6/45	842/28034	0.00216333	0.14241
2	GO:2001038	BP	regulation of cellular response to drug	2/45	44/28034	0.00228338	0.148434
2	GO:2001023	BP	regulation of response to drug	2/45	44/28034	0.00228338	0.148434
2	GO:0010193	BP	response to ozone	2/45	45/28034	0.00238715	0.154216
2	GO:1900055	BP	regulation of leaf senescence	2/45	46/28034	0.00249311	0.160067
45	GO:0008150	BP	biological_process	45/45	24358/28034	0.00312629	0.198267
6	GO:0048523	BP	negative regulation of cellular process	6/45	911/28034	0.0031997	0.198601
1	GO:0007263	BP	nitric oxide mediated signal transduction	1/45	2/28034	0.00320787	0.198601
4	GO:0045087	BP	innate immune response	4/45	382/28034	0.00325461	0.199125
4	GO:0006955	BP	immune response	4/45	389/28034	0.00347247	0.211212
2	GO:0048527	BP	lateral root development	2/45	56/28034	0.00367199	0.222048
3	GO:0009636	BP	response to toxic substance	3/45	198/28034	0.003959	0.238021
5	GO:0070887	BP	cellular response to chemical stimulus	5/45	673/28034	0.00434333	0.259626
3	GO:0009873	BP	ethylene-activated signaling pathway	3/45	206/28034	0.00442162	0.262796
2	GO:0048528	BP	post-embryonic root development	2/45	68/28034	0.0053658	0.31213
7	GO:0048519	BP	negative regulation of biological process	7/45	1349/28034	0.00537172	0.31213
2	GO:0090696	BP	post-embryonic plant organ development	2/45	72/28034	0.0059962	0.346481
3	GO:0071456	BP	cellular response to hypoxia	3/45	234/28034	0.00629308	0.361626
3	GO:0071453	BP	cellular response to oxygen levels	3/45	236/28034	0.0064422	0.366149
3	GO:0036294	BP	cellular response to decreased oxygen levels	3/45	236/28034	0.0064422	0.366149
3	GO:0032101	BP	regulation of response to external stimulus	3/45	237/28034	0.00651754	0.368418
2	GO:0002252	BP	immune effector process	2/45	79/28034	0.00717662	0.403481
2	GO:0002218	BP	activation of innate immune response	2/45	80/28034	0.00735317	0.408986
2	GO:0002253	BP	activation of immune response	2/45	80/28034	0.00735317	0.408986
2	GO:1902531	BP	regulation of intracellular signal transduction	2/45	83/28034	0.00789455	0.434753
1	GO:0032107	BP	regulation of response to nutrient levels	1/45	5/28034	0.00800081	0.434753
1	GO:0032104	BP	regulation of response to extracellular stimulus	1/45	5/28034	0.00800081	0.434753
1	GO:0080029	BP	cellular response to boron-containing substance levels	1/45	5/28034	0.00800081	0.434753
5	GO:0006970	BP	response to osmotic stress	5/45	795/28034	0.00866766	0.462172
3	GO:0001666	BP	response to hypoxia	3/45	264/28034	0.00875377	0.462172
3	GO:0000160	BP	phosphorelay signal transduction system	3/45	264/28034	0.00875377	0.462172
3	GO:0009408	BP	response to heat	3/45	266/28034	0.00893515	0.469366
3	GO:0036293	BP	response to decreased oxygen levels	3/45	268/28034	0.00911873	0.476602
3	GO:0070482	BP	response to oxygen levels	3/45	270/28034	0.00930451	0.483881
1	GO:0080187	BP	floral organ senescence	1/45	6/28034	0.00959345	0.491534
1	GO:0042659	BP	regulation of cell fate specification	1/45	6/28034	0.00959345	0.491534
1	GO:0010036	BP	response to boron-containing substance	1/45	6/28034	0.00959345	0.491534
2	GO:2000024	BP	regulation of leaf development	2/45	94/28034	0.0100277	0.511265
2	GO:0045089	BP	positive regulation of innate immune response	2/45	96/28034	0.0104401	0.529696
2	GO:0002684	BP	positive regulation of immune system process	2/45	97/28034	0.0106491	0.535079
2	GO:0050778	BP	positive regulation of immune response	2/45	97/28034	0.0106491	0.535079
1	GO:0010508	BP	positive regulation of autophagy	1/45	9/28034	0.0143564	0.70768
1	GO:0080151	BP	positive regulation of salicylic acid mediated signaling pathway	1/45	9/28034	0.0143564	0.70768
1	GO:2001025	BP	positive regulation of response to drug	1/45	9/28034	0.0143564	0.70768
1	GO:2001040	BP	positive regulation of cellular response to drug	1/45	9/28034	0.0143564	0.70768
2	GO:0010119	BP	regulation of stomatal movement	2/45	117/28034	0.0152098	0.746212
7	GO:0048518	BP	positive regulation of biological process	7/45	1666/28034	0.0161305	0.787668
1	GO:0070301	BP	cellular response to hydrogen peroxide	1/45	11/28034	0.0175192	0.83971
3	GO:0048584	BP	positive regulation of response to stimulus	3/45	343/28034	0.0176368	0.841468
2	GO:0002833	BP	positive regulation of response to biotic stimulus	2/45	127/28034	0.0177527	0.843133
2	GO:0032103	BP	positive regulation of response to external stimulus	2/45	130/28034	0.0185485	0.876921
2	GO:0043902	BP	positive regulation of multi-organism process	2/45	131/28034	0.018817	0.885593
1	GO:0010120	BP	camalexin biosynthetic process	1/45	12/28034	0.0190969	0.886726
1	GO:0052317	BP	camalexin metabolic process	1/45	12/28034	0.0190969	0.886726
1	GO:0009864	BP	induced systemic resistance, jasmonic acid mediated signaling pathway	1/45	12/28034	0.0190969	0.886726
3	GO:1990837	MF	sequence-specific double-stranded DNA binding	3/45	359/28034	0.0198754	0.918775
1	GO:0052315	BP	phytoalexin biosynthetic process	1/45	13/28034	0.0206721	0.933967
1	GO:0052314	BP	phytoalexin metabolic process	1/45	13/28034	0.0206721	0.933967
1	GO:0097237	BP	cellular response to toxic substance	1/45	13/28034	0.0206721	0.933967
1	GO:0009700	BP	indole phytoalexin biosynthetic process	1/45	13/28034	0.0206721	0.933967
1	GO:0046217	BP	indole phytoalexin metabolic process	1/45	13/28034	0.0206721	0.933967
2	GO:0031349	BP	positive regulation of defense response	2/45	138/28034	0.0207429	0.933967
2	GO:0045088	BP	regulation of innate immune response	2/45	148/28034	0.0236303	1
1	GO:0010453	BP	regulation of cell fate commitment	1/45	15/28034	0.0238151	1
2	GO:0051241	BP	negative regulation of multicellular organismal process	2/45	156/28034	0.0260524	1
2	GO:0050776	BP	regulation of immune response	2/45	157/28034	0.026362	1
1	GO:1901002	BP	positive regulation of response to salt stress	1/45	17/28034	0.0269483	1
2	GO:0002682	BP	regulation of immune system process	2/45	170/28034	0.0305218	1
2	GO:0051093	BP	negative regulation of developmental process	2/45	172/28034	0.0311836	1
1	GO:0009862	BP	systemic acquired resistance, salicylic acid mediated signaling pathway	1/45	20/28034	0.0316296	1
1	GO:0009870	BP	defense response signaling pathway, resistance gene-dependent	1/45	20/28034	0.0316296	1
1	GO:0009403	BP	toxin biosynthetic process	1/45	21/28034	0.0331851	1
5	GO:0010035	BP	response to inorganic substance	5/45	1142/28034	0.0353544	1
1	GO:0010506	BP	regulation of autophagy	1/45	23/28034	0.0362888	1
4	GO:0035556	BP	intracellular signal transduction	4/45	811/28034	0.0406481	1
2	GO:0009814	BP	defense response, incompatible interaction	2/45	206/28034	0.0432723	1
2	GO:0000987	MF	proximal promoter sequence-specific DNA binding	2/45	144/28034	0.0224564	1
3	GO:0003690	MF	double-stranded DNA binding	3/45	486/28034	0.0429777	1
