# Supplementary material for: Transcriptome and metabolome analyses reveal that Bacillus subtilis BS-Z15 lipopeptides mycosubtilin homologue mediates plant defense responses
Source: Front Plant Sci. 2023 Feb 6;13:1088220. doi: 10.3389/fpls.2022.1088220 (PMC9940755; doi:10.3389/fpls.2022.1088220)
Supplement: Supplementary file 10 [file Table_8.xls]

## Sheet: Supplementary Table 8
Num	Pathway id	Description	Database	Ratio_in_study	Ratio_in_pop	Pvalue	Padjust	First Category	Second Category
115	map04626	Plant-pathogen interaction	KEGG PATHWAY	115/2357	244/10537	5.38661e-18	6.78713e-16	Organismal Systems	Environmental adaptation
84	map04016	MAPK signaling pathway - plant	KEGG PATHWAY	84/2357	181/10537	5.05419e-13	3.18414e-11	Environmental Information Processing	Signal transduction
87	map00940	Phenylpropanoid biosynthesis	KEGG PATHWAY	87/2357	200/10537	1.58319e-11	6.64938e-10	Metabolism	Biosynthesis of other secondary metabolites
19	map00196	Photosynthesis - antenna proteins	KEGG PATHWAY	19/2357	24/10537	5.40392e-09	1.70223e-07	Metabolism	Energy metabolism
64	map00500	Starch and sucrose metabolism	KEGG PATHWAY	64/2357	185/10537	8.60189e-05	0.00154834	Metabolism	Carbohydrate metabolism
25	map00860	Porphyrin and chlorophyll metabolism	KEGG PATHWAY	25/2357	54/10537	8.34034e-05	0.00175147	Metabolism	Metabolism of cofactors and vitamins
42	map00480	Glutathione metabolism	KEGG PATHWAY	42/2357	108/10537	7.4551e-05	0.00187869	Metabolism	Metabolism of other amino acids
102	map04075	Plant hormone signal transduction	KEGG PATHWAY	102/2357	328/10537	0.000127518	0.00200841	Environmental Information Processing	Signal transduction
18	map00908	Zeatin biosynthesis	KEGG PATHWAY	18/2357	37/10537	0.000382098	0.00534937	Metabolism	Metabolism of terpenoids and polyketides
44	map00270	Cysteine and methionine metabolism	KEGG PATHWAY	44/2357	126/10537	0.000829494	0.00950148	Metabolism	Amino acid metabolism
15	map00966	Glucosinolate biosynthesis	KEGG PATHWAY	15/2357	30/10537	0.000810227	0.0102089	Metabolism	Biosynthesis of other secondary metabolites
28	map00380	Tryptophan metabolism	KEGG PATHWAY	28/2357	75/10537	0.00230691	0.0242226	Metabolism	Amino acid metabolism
23	map00400	Phenylalanine, tyrosine and tryptophan biosynthesis	KEGG PATHWAY	23/2357	59/10537	0.00290304	0.0281372	Metabolism	Amino acid metabolism
17	map00960	Tropane, piperidine and pyridine alkaloid biosynthesis	KEGG PATHWAY	17/2357	40/10537	0.00349462	0.0314515	Metabolism	Biosynthesis of other secondary metabolites
11	map00904	Diterpenoid biosynthesis	KEGG PATHWAY	11/2357	22/10537	0.00404116	0.0339458	Metabolism	Metabolism of terpenoids and polyketides
17	map02010	ABC transporters	KEGG PATHWAY	17/2357	41/10537	0.00474537	0.0373698	Environmental Information Processing	Membrane transport
6	map00591	Linoleic acid metabolism	KEGG PATHWAY	6/2357	9/10537	0.00555621	0.0411813	Metabolism	Lipid metabolism
28	map00460	Cyanoamino acid metabolism	KEGG PATHWAY	28/2357	81/10537	0.00797082	0.0557958	Metabolism	Metabolism of other amino acids
15	map00360	Phenylalanine metabolism	KEGG PATHWAY	15/2357	37/10537	0.00990375	0.0656775	Metabolism	Amino acid metabolism
17	map00350	Tyrosine metabolism	KEGG PATHWAY	17/2357	45/10537	0.0138388	0.0830328	Metabolism	Amino acid metabolism
17	map00910	Nitrogen metabolism	KEGG PATHWAY	17/2357	45/10537	0.0138388	0.0830328	Metabolism	Energy metabolism
28	map00195	Photosynthesis	KEGG PATHWAY	28/2357	84/10537	0.0135854	0.0855879	Metabolism	Energy metabolism
12	map00906	Carotenoid biosynthesis	KEGG PATHWAY	12/2357	30/10537	0.0225621	0.118451	Metabolism	Metabolism of terpenoids and polyketides
17	map04712	Circadian rhythm - plant	KEGG PATHWAY	17/2357	47/10537	0.0218254	0.119565	Organismal Systems	Environmental adaptation
16	map00920	Sulfur metabolism	KEGG PATHWAY	16/2357	44/10537	0.0243656	0.122803	Metabolism	Energy metabolism
8	map00740	Riboflavin metabolism	KEGG PATHWAY	8/2357	18/10537	0.030931	0.149897	Metabolism	Metabolism of cofactors and vitamins
18	map00250	Alanine, aspartate and glutamate metabolism	KEGG PATHWAY	18/2357	53/10537	0.0353942	0.165173	Metabolism	Amino acid metabolism
3	map00901	Indole alkaloid biosynthesis	KEGG PATHWAY	3/2357	4/10537	0.0372298	0.167534	Metabolism	Biosynthesis of other secondary metabolites
14	map00130	Ubiquinone and other terpenoid-quinone biosynthesis	KEGG PATHWAY	14/2357	40/10537	0.0467029	0.202916	Metabolism	Metabolism of cofactors and vitamins
5	map00945	Stilbenoid, diarylheptanoid and gingerol biosynthesis	KEGG PATHWAY	5/2357	10/10537	0.0510172	0.20736	Metabolism	Biosynthesis of other secondary metabolites
2	map01502	Vancomycin resistance	KEGG PATHWAY	2/2357	2/10537	0.0500198	0.210083	Human Diseases	Drug resistance: Antimicrobial
18	map00330	Arginine and proline metabolism	KEGG PATHWAY	18/2357	56/10537	0.0590591	0.232545	Metabolism	Amino acid metabolism
9	map00950	Isoquinoline alkaloid biosynthesis	KEGG PATHWAY	9/2357	24/10537	0.067868	0.259132	Metabolism	Biosynthesis of other secondary metabolites
10	map00790	Folate biosynthesis	KEGG PATHWAY	10/2357	30/10537	0.113165	0.419375	Metabolism	Metabolism of cofactors and vitamins
3	map00944	Flavone and flavonol biosynthesis	KEGG PATHWAY	3/2357	6/10537	0.130037	0.442827	Metabolism	Biosynthesis of other secondary metabolites
13	map00909	Sesquiterpenoid and triterpenoid biosynthesis	KEGG PATHWAY	13/2357	43/10537	0.145724	0.447834	Metabolism	Metabolism of terpenoids and polyketides
10	map00600	Sphingolipid metabolism	KEGG PATHWAY	10/2357	31/10537	0.135167	0.448184	Metabolism	Lipid metabolism
7	map00590	Arachidonic acid metabolism	KEGG PATHWAY	7/2357	20/10537	0.139077	0.449327	Metabolism	Lipid metabolism
14	map00061	Fatty acid biosynthesis	KEGG PATHWAY	14/2357	46/10537	0.128867	0.451035	Metabolism	Lipid metabolism
6	map00780	Biotin metabolism	KEGG PATHWAY	6/2357	16/10537	0.126428	0.455142	Metabolism	Metabolism of cofactors and vitamins
5	map00514	Other types of O-glycan biosynthesis	KEGG PATHWAY	5/2357	13/10537	0.144683	0.455752	Metabolism	Glycan biosynthesis and metabolism
22	map00561	Glycerolipid metabolism	KEGG PATHWAY	22/2357	80/10537	0.165264	0.462739	Metabolism	Lipid metabolism
9	map00941	Flavonoid biosynthesis	KEGG PATHWAY	9/2357	28/10537	0.154541	0.463623	Metabolism	Biosynthesis of other secondary metabolites
24	map04070	Phosphatidylinositol signaling system	KEGG PATHWAY	24/2357	88/10537	0.163104	0.46707	Environmental Information Processing	Signal transduction
34	map00040	Pentose and glucuronate interconversions	KEGG PATHWAY	34/2357	129/10537	0.1615	0.473232	Metabolism	Carbohydrate metabolism
7	map00730	Thiamine metabolism	KEGG PATHWAY	7/2357	22/10537	0.204525	0.560222	Metabolism	Metabolism of cofactors and vitamins
4	map00430	Taurine and hypotaurine metabolism	KEGG PATHWAY	4/2357	11/10537	0.217143	0.570001	Metabolism	Metabolism of other amino acids
11	map00100	Steroid biosynthesis	KEGG PATHWAY	11/2357	38/10537	0.213573	0.572556	Metabolism	Lipid metabolism
17	map00900	Terpenoid backbone biosynthesis	KEGG PATHWAY	17/2357	63/10537	0.228762	0.588245	Metabolism	Metabolism of terpenoids and polyketides
16	map00053	Ascorbate and aldarate metabolism	KEGG PATHWAY	16/2357	61/10537	0.277542	0.672507	Metabolism	Carbohydrate metabolism
11	map00220	Arginine biosynthesis	KEGG PATHWAY	11/2357	40/10537	0.270142	0.680759	Metabolism	Amino acid metabolism
5	map00300	Lysine biosynthesis	KEGG PATHWAY	5/2357	16/10537	0.277464	0.685499	Metabolism	Amino acid metabolism
12	map00592	alpha-Linolenic acid metabolism	KEGG PATHWAY	12/2357	45/10537	0.295391	0.702251	Metabolism	Lipid metabolism
26	map00230	Purine metabolism	KEGG PATHWAY	26/2357	105/10537	0.312084	0.714957	Metabolism	Nucleotide metabolism
2	map00601	Glycosphingolipid biosynthesis - lacto and neolacto series	KEGG PATHWAY	2/2357	5/10537	0.311817	0.727572	Metabolism	Glycan biosynthesis and metabolism
4	map00261	Monobactam biosynthesis	KEGG PATHWAY	4/2357	13/10537	0.328084	0.738189	Metabolism	Biosynthesis of other secondary metabolites
27	map00564	Glycerophospholipid metabolism	KEGG PATHWAY	27/2357	111/10537	0.344601	0.761751	Metabolism	Lipid metabolism
22	map04145	Phagosome	KEGG PATHWAY	22/2357	91/10537	0.378324	0.781455	Cellular Processes	Transport and catabolism
6	map00650	Butanoate metabolism	KEGG PATHWAY	6/2357	22/10537	0.367319	0.797969	Metabolism	Carbohydrate metabolism
7	map01040	Biosynthesis of unsaturated fatty acids	KEGG PATHWAY	7/2357	27/10537	0.400015	0.800031	Metabolism	Lipid metabolism
5	map00750	Vitamin B6 metabolism	KEGG PATHWAY	5/2357	18/10537	0.375938	0.802852	Metabolism	Metabolism of cofactors and vitamins
5	map00760	Nicotinate and nicotinamide metabolism	KEGG PATHWAY	5/2357	18/10537	0.375938	0.802852	Metabolism	Metabolism of cofactors and vitamins
1	map00965	Betalain biosynthesis	KEGG PATHWAY	1/2357	2/10537	0.397356	0.80753	Metabolism	Biosynthesis of other secondary metabolites
19	map00260	Glycine, serine and threonine metabolism	KEGG PATHWAY	19/2357	80/10537	0.425969	0.838626	Metabolism	Amino acid metabolism
29	map00010	Glycolysis / Gluconeogenesis	KEGG PATHWAY	29/2357	126/10537	0.465299	0.849676	Metabolism	Carbohydrate metabolism
7	map00770	Pantothenate and CoA biosynthesis	KEGG PATHWAY	7/2357	28/10537	0.440766	0.854407	Metabolism	Metabolism of cofactors and vitamins
12	map00280	Valine, leucine and isoleucine degradation	KEGG PATHWAY	12/2357	51/10537	0.475297	0.855534	Metabolism	Amino acid metabolism
36	map00520	Amino sugar and nucleotide sugar metabolism	KEGG PATHWAY	36/2357	157/10537	0.463874	0.859532	Metabolism	Carbohydrate metabolism
21	map00620	Pyruvate metabolism	KEGG PATHWAY	21/2357	90/10537	0.453694	0.866142	Metabolism	Carbohydrate metabolism
3	map00603	Glycosphingolipid biosynthesis - globo and isoglobo series	KEGG PATHWAY	3/2357	11/10537	0.460885	0.866739	Metabolism	Glycan biosynthesis and metabolism
5	map00290	Valine, leucine and isoleucine biosynthesis	KEGG PATHWAY	5/2357	21/10537	0.52143	0.925354	Metabolism	Amino acid metabolism
6	map00565	Ether lipid metabolism	KEGG PATHWAY	6/2357	26/10537	0.541704	0.947982	Metabolism	Lipid metabolism
22	map04146	Peroxisome	KEGG PATHWAY	22/2357	99/10537	0.553539	0.955423	Cellular Processes	Transport and catabolism
16	map00710	Carbon fixation in photosynthetic organisms	KEGG PATHWAY	16/2357	75/10537	0.630123	1	Metabolism	Energy metabolism
1	map00942	Anthocyanin biosynthesis	KEGG PATHWAY	1/2357	4/10537	0.63686	1	Metabolism	Biosynthesis of other secondary metabolites
8	map00062	Fatty acid elongation	KEGG PATHWAY	8/2357	38/10537	0.639832	1	Metabolism	Lipid metabolism
4	map00450	Selenocompound metabolism	KEGG PATHWAY	4/2357	19/10537	0.643167	1	Metabolism	Metabolism of other amino acids
10	map00071	Fatty acid degradation	KEGG PATHWAY	10/2357	48/10537	0.65624	1	Metabolism	Lipid metabolism
4	map00511	Other glycan degradation	KEGG PATHWAY	4/2357	20/10537	0.685417	1	Metabolism	Glycan biosynthesis and metabolism
13	map00052	Galactose metabolism	KEGG PATHWAY	13/2357	64/10537	0.70064	1	Metabolism	Carbohydrate metabolism
1	map00785	Lipoic acid metabolism	KEGG PATHWAY	1/2357	5/10537	0.718121	1	Metabolism	Metabolism of cofactors and vitamins
1	map00604	Glycosphingolipid biosynthesis - ganglio series	KEGG PATHWAY	1/2357	5/10537	0.718121	1	Metabolism	Glycan biosynthesis and metabolism
1	map00232	Caffeine metabolism	KEGG PATHWAY	1/2357	5/10537	0.718121	1	Metabolism	Biosynthesis of other secondary metabolites
1	map00440	Phosphonate and phosphinate metabolism	KEGG PATHWAY	1/2357	5/10537	0.718121	1	Metabolism	Metabolism of other amino acids
14	map00051	Fructose and mannose metabolism	KEGG PATHWAY	14/2357	70/10537	0.727153	1	Metabolism	Carbohydrate metabolism
10	map00410	beta-Alanine metabolism	KEGG PATHWAY	10/2357	51/10537	0.733549	1	Metabolism	Metabolism of other amino acids
2	map00531	Glycosaminoglycan degradation	KEGG PATHWAY	2/2357	11/10537	0.742818	1	Metabolism	Glycan biosynthesis and metabolism
12	map00030	Pentose phosphate pathway	KEGG PATHWAY	12/2357	63/10537	0.780879	1	Metabolism	Carbohydrate metabolism
16	map00630	Glyoxylate and dicarboxylate metabolism	KEGG PATHWAY	16/2357	83/10537	0.788847	1	Metabolism	Carbohydrate metabolism
16	map00562	Inositol phosphate metabolism	KEGG PATHWAY	16/2357	83/10537	0.788847	1	Metabolism	Carbohydrate metabolism
8	map00640	Propanoate metabolism	KEGG PATHWAY	8/2357	45/10537	0.819969	1	Metabolism	Carbohydrate metabolism
9	map04130	SNARE interactions in vesicular transport	KEGG PATHWAY	9/2357	52/10537	0.852971	1	Genetic Information Processing	Folding, sorting and degradation
3	map00340	Histidine metabolism	KEGG PATHWAY	3/2357	20/10537	0.857805	1	Metabolism	Amino acid metabolism
7	map03430	Mismatch repair	KEGG PATHWAY	7/2357	42/10537	0.860337	1	Genetic Information Processing	Replication and repair
4	map04933	AGE-RAGE signaling pathway in diabetic complications	KEGG PATHWAY	4/2357	26/10537	0.865191	1	Human Diseases	Endocrine and metabolic diseases
9	map03030	DNA replication	KEGG PATHWAY	9/2357	53/10537	0.868277	1	Genetic Information Processing	Replication and repair
8	map00073	Cutin, suberine and wax biosynthesis	KEGG PATHWAY	8/2357	48/10537	0.871839	1	Metabolism	Lipid metabolism
1	map00905	Brassinosteroid biosynthesis	KEGG PATHWAY	1/2357	9/10537	0.897694	1	Metabolism	Metabolism of terpenoids and polyketides
1	map00902	Monoterpenoid biosynthesis	KEGG PATHWAY	1/2357	9/10537	0.897694	1	Metabolism	Metabolism of terpenoids and polyketides
13	map03440	Homologous recombination	KEGG PATHWAY	13/2357	77/10537	0.906174	1	Genetic Information Processing	Replication and repair
10	map00240	Pyrimidine metabolism	KEGG PATHWAY	10/2357	65/10537	0.939216	1	Metabolism	Nucleotide metabolism
7	map03410	Base excision repair	KEGG PATHWAY	7/2357	49/10537	0.943939	1	Genetic Information Processing	Replication and repair
31	map04144	Endocytosis	KEGG PATHWAY	31/2357	179/10537	0.961036	1	Cellular Processes	Transport and catabolism
1	map04122	Sulfur relay system	KEGG PATHWAY	1/2357	13/10537	0.962885	1	Genetic Information Processing	Folding, sorting and degradation
9	map00020	Citrate cycle (TCA cycle)	KEGG PATHWAY	9/2357	65/10537	0.970178	1	Metabolism	Carbohydrate metabolism
40	map04141	Protein processing in endoplasmic reticulum	KEGG PATHWAY	40/2357	230/10537	0.974686	1	Genetic Information Processing	Folding, sorting and degradation
4	map00310	Lysine degradation	KEGG PATHWAY	4/2357	39/10537	0.985091	1	Metabolism	Amino acid metabolism
7	map03060	Protein export	KEGG PATHWAY	7/2357	58/10537	0.985092	1	Genetic Information Processing	Folding, sorting and degradation
5	map00510	N-Glycan biosynthesis	KEGG PATHWAY	5/2357	51/10537	0.994313	1	Metabolism	Glycan biosynthesis and metabolism
8	map03420	Nucleotide excision repair	KEGG PATHWAY	8/2357	73/10537	0.996288	1	Genetic Information Processing	Replication and repair
2	map00513	Various types of N-glycan biosynthesis	KEGG PATHWAY	2/2357	32/10537	0.996936	1	Metabolism	Glycan biosynthesis and metabolism
1	map00670	One carbon pool by folate	KEGG PATHWAY	1/2357	23/10537	0.997064	1	Metabolism	Metabolism of cofactors and vitamins
17	map03015	mRNA surveillance pathway	KEGG PATHWAY	17/2357	130/10537	0.997563	1	Genetic Information Processing	Translation
16	map03018	RNA degradation	KEGG PATHWAY	16/2357	125/10537	0.997814	1	Genetic Information Processing	Folding, sorting and degradation
1	map00563	Glycosylphosphatidylinositol (GPI)-anchor biosynthesis	KEGG PATHWAY	1/2357	26/10537	0.998629	1	Metabolism	Glycan biosynthesis and metabolism
4	map03022	Basal transcription factors	KEGG PATHWAY	4/2357	58/10537	0.999636	1	Genetic Information Processing	Transcription
3	map03020	RNA polymerase	KEGG PATHWAY	3/2357	52/10537	0.999765	1	Genetic Information Processing	Transcription
1	map04136	Autophagy - other	KEGG PATHWAY	1/2357	41/10537	0.99997	1	Cellular Processes	Transport and catabolism
17	map04120	Ubiquitin mediated proteolysis	KEGG PATHWAY	17/2357	161/10537	0.999972	1	Genetic Information Processing	Folding, sorting and degradation
3	map00970	Aminoacyl-tRNA biosynthesis	KEGG PATHWAY	3/2357	65/10537	0.999987	1	Genetic Information Processing	Translation
2	map03050	Proteasome	KEGG PATHWAY	2/2357	65/10537	0.999999	1	Genetic Information Processing	Folding, sorting and degradation
5	map03008	Ribosome biogenesis in eukaryotes	KEGG PATHWAY	5/2357	96/10537	0.999999	1	Genetic Information Processing	Translation
26	map03010	Ribosome	KEGG PATHWAY	26/2357	369/10537	1	1	Genetic Information Processing	Translation
9	map00190	Oxidative phosphorylation	KEGG PATHWAY	9/2357	181/10537	1	1	Metabolism	Energy metabolism
10	map03040	Spliceosome	KEGG PATHWAY	10/2357	210/10537	1	1	Genetic Information Processing	Transcription
10	map03013	RNA transport	KEGG PATHWAY	10/2357	198/10537	1	1	Genetic Information Processing	Translation
