# Supplementary material for: Transcriptome and metabolome analyses reveal that Bacillus subtilis BS-Z15 lipopeptides mycosubtilin homologue mediates plant defense responses
Source: Front Plant Sci. 2023 Feb 6;13:1088220. doi: 10.3389/fpls.2022.1088220 (PMC9940755; doi:10.3389/fpls.2022.1088220)
Supplement: Supplementary file 11 [file Table_9.xls]

## Sheet: Supplementary Table 9
Pathway	Pathway ID	First Category	Second Category	Number
ABC transporters	map02010	Environmental Information Processing	Membrane transport	18
Aminoacyl-tRNA biosynthesis	map00970	Genetic Information Processing	Translation	13
Alanine, aspartate and glutamate metabolism	map00250	Metabolism	Amino acid metabolism	10
Arginine and proline metabolism	map00330	Metabolism	Amino acid metabolism	9
Glyoxylate and dicarboxylate metabolism	map00630	Metabolism	Carbohydrate metabolism	9
Phenylalanine metabolism	map00360	Metabolism	Amino acid metabolism	9
Glycine, serine and threonine metabolism	map00260	Metabolism	Amino acid metabolism	8
Cyanoamino acid metabolism	map00460	Metabolism	Metabolism of other amino acids	8
beta-Alanine metabolism	map00410	Metabolism	Metabolism of other amino acids	7
Nicotinate and nicotinamide metabolism	map00760	Metabolism	Metabolism of cofactors and vitamins	7
Arginine biosynthesis	map00220	Metabolism	Amino acid metabolism	6
Butanoate metabolism	map00650	Metabolism	Carbohydrate metabolism	6
Pentose phosphate pathway	map00030	Metabolism	Carbohydrate metabolism	6
Pantothenate and CoA biosynthesis	map00770	Metabolism	Metabolism of cofactors and vitamins	6
Tropane, piperidine and pyridine alkaloid biosynthesis	map00960	Metabolism	Biosynthesis of other secondary metabolites	5
Phenylpropanoid biosynthesis	map00940	Metabolism	Biosynthesis of other secondary metabolites	5
Pyruvate metabolism	map00620	Metabolism	Carbohydrate metabolism	5
Tyrosine metabolism	map00350	Metabolism	Amino acid metabolism	5
Glycolysis / Gluconeogenesis	map00010	Metabolism	Carbohydrate metabolism	5
Valine, leucine and isoleucine biosynthesis	map00290	Metabolism	Amino acid metabolism	5
Monobactam biosynthesis	map00261	Metabolism	Biosynthesis of other secondary metabolites	5
Pyrimidine metabolism	map00240	Metabolism	Nucleotide metabolism	5
Purine metabolism	map00230	Metabolism	Nucleotide metabolism	5
Vancomycin resistance	map01502	Human Diseases	Drug resistance: Antimicrobial	5
Galactose metabolism	map00052	Metabolism	Carbohydrate metabolism	5
Cysteine and methionine metabolism	map00270	Metabolism	Amino acid metabolism	4
Histidine metabolism	map00340	Metabolism	Amino acid metabolism	4
Carbon fixation in photosynthetic organisms	map00710	Metabolism	Energy metabolism	4
Glucosinolate biosynthesis	map00966	Metabolism	Biosynthesis of other secondary metabolites	4
Propanoate metabolism	map00640	Metabolism	Carbohydrate metabolism	4
Fructose and mannose metabolism	map00051	Metabolism	Carbohydrate metabolism	4
Citrate cycle (TCA cycle)	map00020	Metabolism	Carbohydrate metabolism	4
Porphyrin and chlorophyll metabolism	map00860	Metabolism	Metabolism of cofactors and vitamins	3
C5-Branched dibasic acid metabolism	map00660	Metabolism	Carbohydrate metabolism	3
Pentose and glucuronate interconversions	map00040	Metabolism	Carbohydrate metabolism	3
Ascorbate and aldarate metabolism	map00053	Metabolism	Carbohydrate metabolism	3
Biosynthesis of unsaturated fatty acids	map01040	Metabolism	Lipid metabolism	3
Oxidative phosphorylation	map00190	Metabolism	Energy metabolism	3
Taurine and hypotaurine metabolism	map00430	Metabolism	Metabolism of other amino acids	3
Phenylalanine, tyrosine and tryptophan biosynthesis	map00400	Metabolism	Amino acid metabolism	3
Tryptophan metabolism	map00380	Metabolism	Amino acid metabolism	3
Lysine degradation	map00310	Metabolism	Amino acid metabolism	3
Nitrogen metabolism	map00910	Metabolism	Energy metabolism	2
Biotin metabolism	map00780	Metabolism	Metabolism of cofactors and vitamins	2
Sulfur metabolism	map00920	Metabolism	Energy metabolism	2
Amino sugar and nucleotide sugar metabolism	map00520	Metabolism	Carbohydrate metabolism	2
Glycerolipid metabolism	map00561	Metabolism	Lipid metabolism	2
Fatty acid degradation	map00071	Metabolism	Lipid metabolism	2
Thiamine metabolism	map00730	Metabolism	Metabolism of cofactors and vitamins	2
Steroid biosynthesis	map00100	Metabolism	Lipid metabolism	2
Cutin, suberine and wax biosynthesis	map00073	Metabolism	Lipid metabolism	2
Glutathione metabolism	map00480	Metabolism	Metabolism of other amino acids	2
Valine, leucine and isoleucine degradation	map00280	Metabolism	Amino acid metabolism	2
Lysine biosynthesis	map00300	Metabolism	Amino acid metabolism	2
Glycerophospholipid metabolism	map00564	Metabolism	Lipid metabolism	2
Sphingolipid metabolism	map00600	Metabolism	Lipid metabolism	2
Fatty acid elongation	map00062	Metabolism	Lipid metabolism	1
Fatty acid biosynthesis	map00061	Metabolism	Lipid metabolism	1
Sulfur relay system	map04122	Genetic Information Processing	Folding, sorting and degradation	1
Ubiquinone and other terpenoid-quinone biosynthesis	map00130	Metabolism	Metabolism of cofactors and vitamins	1
Photosynthesis	map00195	Metabolism	Energy metabolism	1
Riboflavin metabolism	map00740	Metabolism	Metabolism of cofactors and vitamins	1
Selenocompound metabolism	map00450	Metabolism	Metabolism of other amino acids	1
Phosphonate and phosphinate metabolism	map00440	Metabolism	Metabolism of other amino acids	1
Isoquinoline alkaloid biosynthesis	map00950	Metabolism	Biosynthesis of other secondary metabolites	1
Anthocyanin biosynthesis	map00942	Metabolism	Biosynthesis of other secondary metabolites	1
Flavonoid biosynthesis	map00941	Metabolism	Biosynthesis of other secondary metabolites	1
Starch and sucrose metabolism	map00500	Metabolism	Carbohydrate metabolism	1
Zeatin biosynthesis	map00908	Metabolism	Metabolism of terpenoids and polyketides	1
Monoterpenoid biosynthesis	map00902	Metabolism	Metabolism of terpenoids and polyketides	1
Indole alkaloid biosynthesis	map00901	Metabolism	Biosynthesis of other secondary metabolites	1
Terpenoid backbone biosynthesis	map00900	Metabolism	Metabolism of terpenoids and polyketides	1
AGE-RAGE signaling pathway in diabetic complications	map04933	Human Diseases	Endocrine and metabolic diseases	1
