# Supplementary material for: Transcriptome and metabolome analyses reveal that Bacillus subtilis BS-Z15 lipopeptides mycosubtilin homologue mediates plant defense responses
Source: Front Plant Sci. 2023 Feb 6;13:1088220. doi: 10.3389/fpls.2022.1088220 (PMC9940755; doi:10.3389/fpls.2022.1088220)
Supplement: Supplementary file 12 [file Table_10.xls]

## Sheet: Supplementary Table 10
Metabolite	Metab ID	Formula	KEGG Pathway Description	VIP_pred_OPLS-DA	VIP_PLS-DA	FC(B/A)	P_value	FDR	A_2	A_3	A_4	A_5	A_6	B_1	B_2	B_3	B_4	B_5	B_6	Fragmentation Score	Theoretical Fragmentation Score	Score	KEGG Pathway ID	Retention time	cas_id	KEGG Pathway Description	HMDB Subclass	KEGG Pathway Second Category	KEGG Pathway First Category	KEGG Compound First Category	Library ID	subclass	mode	formula	Quant Mass	KEGG Compound Second Category	HMDB Superclass	KEGG Compound ID
2,3-butanediol	metab_1	C4H10O2		1.27317	1.2594	1.12553	9.047e-07	4.996e-06	4.5313	4.4183	4.4227	4.4598	4.5108	4.896	5.0184	5.14	5.0646	4.9471	5.1146				-	5.65	513-85-9	-	Organooxygen compounds	-	-	-	HMDB0003156	Alcohols and polyols	pos	C4H10O2	221.1	-	Organic oxygen compounds	C00265
3-methyl-2-oxobutanoic acid	metab_3	C5H8O3		2.9806	2.96118	2.01515	8.598e-12	1.169e-09	3.1747	2.9518	2.8766	2.8583	2.9952	5.8755	5.9273	5.9654	6.1061	5.9236	6.1218				map01100;map01110;map00280;map00290;map01210;map01230;map00966;map00770	6.095	759-05-7	Metabolic pathways;Biosynthesis of secondary metabolites;Valine, leucine and isoleucine degradation;Valine, leucine and isoleucine biosynthesis;2-Oxocarboxylic acid metabolism;Biosynthesis of amino acids;Glucosinolate biosynthesis;Pantothenate and CoA biosynthesis	Keto acids and derivatives	Global and overview maps;Global and overview maps;Amino acid metabolism;Amino acid metabolism;Global and overview maps;Global and overview maps;Biosynthesis of other secondary metabolites;Metabolism of cofactors and vitamins	Metabolism;Metabolism;Metabolism;Metabolism;Metabolism;Metabolism;Metabolism;Metabolism	Organic acids	HMDB0000019	Short-chain keto acids and derivatives	pos	C5H8O3	61	Carboxylic acids	Organic acids and derivatives	C00141
biphenyl	metab_4	C12H10		1.28368	1.26739	1.12997	7.633e-07	4.719e-06	4.3662	4.5107	4.3483	4.253	4.4111	4.8862	4.9177	5.016	4.9263	4.9001	5.0352				map01100	6.455	92-52-4	Metabolic pathways	Benzene and substituted derivatives	Global and overview maps	Metabolism	-	HMDB0034437	Biphenyls and derivatives	pos	C12H10	153.1	-	Benzenoids	C06588
2-hydroxypyridine	metab_5	C5H5NO		1.28021	1.26381	1.1079	9.184e-07	4.996e-06	5.2444	5.3875	5.229	5.1283	5.2859	5.7627	5.7852	5.8884	5.8086	5.7668	5.9177				-	6.457	142-08-5	-	Pyridines and derivatives	-	-	-	HMDB0013751	Hydropyridines	pos	C5H5NO	152.1	-	Organoheterocyclic compounds	C02502
pyruvic acid	metab_6	C3H4O3		1.24279	1.2198	1.12846	0.001762	0.002959	4.4565	4.8419	4.5574	4.85	5.3503	5.4574	5.4221	5.4648	5.427	5.399	5.402				map01110;map01502;map00270;map00040;map01200;map00330;map00250;map00440;map00350;map00020;map00630;map00770;map00430;map00730;map00710;map00900;map01100;map01210;map00053;map00010;map00360;map01230;map00260;map00261;map00660;map00030;map00760;map00650;map00620;map00290	6.604	127-17-3	Biosynthesis of secondary metabolites;Vancomycin resistance;Cysteine and methionine metabolism;Pentose and glucuronate interconversions;Carbon metabolism;Arginine and proline metabolism;Alanine, aspartate and glutamate metabolism;Phosphonate and phosphinate metabolism;Tyrosine metabolism;Citrate cycle (TCA cycle);Glyoxylate and dicarboxylate metabolism;Pantothenate and CoA biosynthesis;Taurine an…	Keto acids and derivatives	Global and overview maps;Drug resistance: Antimicrobial;Amino acid metabolism;Carbohydrate metabolism;Global and overview maps;Amino acid metabolism;Amino acid metabolism;Metabolism of other amino acids;Amino acid metabolism;Carbohydrate metabolism;Carbohydrate metabolism;Metabolism of cofactors and vitamins;Metabolism of other amino acids;Metabolism of cofactors and vitamins;Energy metabolism;Me…	Metabolism;Human Diseases;Metabolism;Metabolism;Metabolism;Metabolism;Metabolism;Metabolism;Metabolism;Metabolism;Metabolism;Metabolism;Metabolism;Metabolism;Metabolism;Metabolism;Metabolism;Metabolism;Metabolism;Metabolism;Metabolism;Metabolism;Metabolism;Metabolism;Metabolism;Metabolism;Metabolism;Metabolism;Metabolism;Metabolism	Organic acids	LMFA01060077;HMDB0000243	Alpha-keto acids and derivatives	pos	C3H4O3	174.1	Carboxylic acids	Organic acids and derivatives	C00022
glycolic acid	metab_8	C2H4O3		1.00215	0.987645	1.07811	8.533e-06	2.577e-05	4.4774	4.5786	4.5059	4.447	4.5884	4.7824	4.8525	4.8979	4.8842	4.8356	4.9801				map01100;map00630;map01110;map00071;map01200	7.05	79-14-1	Metabolic pathways;Glyoxylate and dicarboxylate metabolism;Biosynthesis of secondary metabolites;Fatty acid degradation;Carbon metabolism	Hydroxy acids and derivatives	Global and overview maps;Carbohydrate metabolism;Global and overview maps;Lipid metabolism;Global and overview maps	Metabolism;Metabolism;Metabolism;Metabolism;Metabolism	-	HMDB0000115	Alpha hydroxy acids and derivatives	pos	C2H4O3	147.1	-	Organic acids and derivatives	C00160;C03547
benzoylformic acid	metab_9	-		1.22253	1.21032	1.1243	4.775e-08	4.995e-07	4.189	4.1019	4.1443	4.0369	4.1246	4.5718	4.6136	4.7117	4.6322	4.6125	4.6444				map00360	7.384	-	Phenylalanine metabolism	-	Amino acid metabolism	Metabolism	-	-	-	pos	-	244.1	-	-	C02137
N-methylalanine	metab_11	C4H9NO2		1.18978	1.18334	1.10522	2.195e-06	9.864e-06	4.7884	4.8932	4.8006	4.6302	4.6496	5.2039	5.2236	5.2967	5.2538	5.2693	5.2664				-	7.995	-	-	Carboxylic acids and derivatives	-	-	-	HMDB0094692	Amino acids, peptides, and analogues	pos	C4H9NO2	147.1	-	Organic acids and derivatives	-
oxalic acid	metab_13	C2H2O4		1.09289	1.08328	1.07616	2.907e-07	2.196e-06	5.4747	5.452	5.3758	5.3694	5.4428	5.7993	5.7881	5.9302	5.8434	5.8551	5.8008				map01100;map00630	8.128	58969-47-4;5844-06-4;6941-81-7;59295-03-3;5725-99-5;34090-00-1;144-62-7;7404-49-1	Metabolic pathways;Glyoxylate and dicarboxylate metabolism	Carboxylic acids and derivatives	Global and overview maps;Carbohydrate metabolism	Metabolism;Metabolism	Organic acids	HMDB0002329	Dicarboxylic acids and derivatives	pos	C2H2O4	147.1	Carboxylic acids	Organic acids and derivatives	C00209
L-valine	metab_20	C5H11NO2		1.14209	1.1335	1.0807	1.936e-09	5.267e-08	5.5168	5.5354	5.4938	5.5053	5.5165	5.9095	5.921	6.0006	5.959	5.9583	6.0035				map01100;map01110;map00280;map00290;map01210;map02010;map01230;map00966;map00460;map00970;map00770	9.423	72-18-4	Metabolic pathways;Biosynthesis of secondary metabolites;Valine, leucine and isoleucine degradation;Valine, leucine and isoleucine biosynthesis;2-Oxocarboxylic acid metabolism;ABC transporters;Biosynthesis of amino acids;Glucosinolate biosynthesis;Cyanoamino acid metabolism;Aminoacyl-tRNA biosynthesis;Pantothenate and CoA biosynthesis	Carboxylic acids and derivatives	Global and overview maps;Global and overview maps;Amino acid metabolism;Amino acid metabolism;Global and overview maps;Membrane transport;Global and overview maps;Biosynthesis of other secondary metabolites;Metabolism of other amino acids;Translation;Metabolism of cofactors and vitamins	Metabolism;Metabolism;Metabolism;Metabolism;Metabolism;Environmental Information Processing;Metabolism;Metabolism;Metabolism;Genetic Information Processing;Metabolism	Peptides	HMDB0000883	Amino acids, peptides, and analogues	pos	C5H11NO2	144.1	Amino acids	Organic acids and derivatives	C00183
4-vinylphenol	metab_21	-		1.03253	1.02354	1.08979	7.142e-07	4.626e-06	4.1521	4.1329	4.1086	4.117	4.1507	4.3995	4.4798	4.5824	4.5536	4.4744	4.5255				map00940	9.928	-	Phenylpropanoid biosynthesis	-	Biosynthesis of other secondary metabolites	Metabolism	-	-	-	pos	-	192.1	-	-	C05627
L-allothreonine	metab_27	C4H9NO3		1.3228	1.31777	1.11804	9.625e-10	3.272e-08	5.0442	5.0874	5.1082	5.1001	5.0766	5.6417	5.6291	5.7327	5.6604	5.738	5.6973				map01100;map00260	10.749	24830-94-2	Metabolic pathways;Glycine, serine and threonine metabolism	Carboxylic acids and derivatives	Global and overview maps;Amino acid metabolism	Metabolism;Metabolism	-	HMDB0004041	Amino acids, peptides, and analogues	pos	C4H9NO3	158.1	-	Organic acids and derivatives	C05519
succinic acid	metab_31	C4H6O4		1.31324	1.3054	1.11069	8.39e-06	2.577e-05	5.3598	5.7259	5.4689	5.6188	5.6059	6.1899	6.1136	6.126	6.1147	6.1587	6.3259				map01100;map00630;map00350;map01110;map00640;map00920;map00650;map01200;map00620;map00760;map00250;map00360;map00020;map00190	11.096	110-15-6	Metabolic pathways;Glyoxylate and dicarboxylate metabolism;Tyrosine metabolism;Biosynthesis of secondary metabolites;Propanoate metabolism;Sulfur metabolism;Butanoate metabolism;Carbon metabolism;Pyruvate metabolism;Nicotinate and nicotinamide metabolism;Alanine, aspartate and glutamate metabolism;Phenylalanine metabolism;Citrate cycle (TCA cycle);Oxidative phosphorylation	Carboxylic acids and derivatives	Global and overview maps;Carbohydrate metabolism;Amino acid metabolism;Global and overview maps;Carbohydrate metabolism;Energy metabolism;Carbohydrate metabolism;Global and overview maps;Carbohydrate metabolism;Metabolism of cofactors and vitamins;Amino acid metabolism;Amino acid metabolism;Carbohydrate metabolism;Energy metabolism	Metabolism;Metabolism;Metabolism;Metabolism;Metabolism;Metabolism;Metabolism;Metabolism;Metabolism;Metabolism;Metabolism;Metabolism;Metabolism;Metabolism	Organic acids	HMDB0000254;LMFA01170043	Dicarboxylic acids and derivatives	pos	C4H6O4	147.1	Carboxylic acids	Organic acids and derivatives	C00042
picolonic acid	metab_32	-		1.70676	1.69015	1.26634	2.302e-06	9.864e-06	3.6734	3.9021	3.5433	3.9492	4.0621	4.8907	4.7733	4.9059	4.7056	4.8144	4.9795				-	11.232	-	-	-	-	-	-	-	-	pos	-	180.1	-	-	-
citraconic acid	metab_34	C5H6O4		1.85884	1.84677	1.29308	3.6e-10	1.632e-08	3.9648	4.0435	4.0696	4.0116	3.99	5.1667	5.2094	5.3375	5.1436	5.0945	5.2034				map01100;map01210;map00660;map00290	11.471	498-23-7	Metabolic pathways;2-Oxocarboxylic acid metabolism;C5-Branched dibasic acid metabolism;Valine, leucine and isoleucine biosynthesis	Fatty Acyls	Global and overview maps;Global and overview maps;Carbohydrate metabolism;Amino acid metabolism	Metabolism;Metabolism;Metabolism;Metabolism	-	HMDB0000634;LMFA01170099	Fatty acids and conjugates	pos	C5H6O4	241.1	-	Lipids and lipid-like molecules	C02226
glycylproline	metab_39	C7H12N2O3		1.34043	1.33465	1.15837	2.321e-06	9.864e-06	4.111	4.1161	3.9749	4.0117	3.8661	4.5154	4.5947	4.7819	4.6566	4.6285	4.735				-	12.712	704-15-4	-	Carboxylic acids and derivatives	-	-	-	HMDB0000721	Amino acids, peptides, and analogues	pos	C7H12N2O3	373.1	-	Organic acids and derivatives	-
D-malic acid	metab_43	C4H6O5		1.04251	1.0283	1.07105	0.0003747	0.0007077	5.7454	5.9126	5.6371	5.8694	5.9717	6.2682	6.1356	6.2689	6.084	6.286	6.4029				map00650	13.91	636-61-3	Butanoate metabolism	Hydroxy acids and derivatives	Carbohydrate metabolism	Metabolism	-	HMDB0031518	Beta hydroxy acids and derivatives	pos	C4H6O5	147.1	-	Organic acids and derivatives	C00497
L-glutamic acid	metab_47	C5H9NO4		1.20469	1.19328	1.08253	8.076e-07	4.775e-06	6.0746	6.1772	6.0215	6.0842	6.1755	6.5276	6.5397	6.7015	6.6818	6.5997	6.6165				map01100;map00630;map00220;map01110;map00430;map01210;map00330;map02010;map00860;map00480;map01230;map00460;map00250;map00910;map00970;map00340;map01200;map00650;map00660	14.412	56-86-0	Metabolic pathways;Glyoxylate and dicarboxylate metabolism;Arginine biosynthesis;Biosynthesis of secondary metabolites;Taurine and hypotaurine metabolism;2-Oxocarboxylic acid metabolism;Arginine and proline metabolism;ABC transporters;Porphyrin and chlorophyll metabolism;Glutathione metabolism;Biosynthesis of amino acids;Cyanoamino acid metabolism;Alanine, aspartate and glutamate metabolism;Nitro…	Carboxylic acids and derivatives	Global and overview maps;Carbohydrate metabolism;Amino acid metabolism;Global and overview maps;Metabolism of other amino acids;Global and overview maps;Amino acid metabolism;Membrane transport;Metabolism of cofactors and vitamins;Metabolism of other amino acids;Global and overview maps;Metabolism of other amino acids;Amino acid metabolism;Energy metabolism;Translation;Amino acid metabolism;Globa…	Metabolism;Metabolism;Metabolism;Metabolism;Metabolism;Metabolism;Metabolism;Environmental Information Processing;Metabolism;Metabolism;Metabolism;Metabolism;Metabolism;Metabolism;Genetic Information Processing;Metabolism;Metabolism;Metabolism;Metabolism	Peptides;Peptides;Hormones and transmitters;-	HMDB0000148	Amino acids, peptides, and analogues	pos	C5H9NO4	232.2	Amino acids;Amino acids;Neurotransmitters;-	Organic acids and derivatives	C00217;C00025;C00302
gamma-aminobutyric acid	metab_48	C4H9NO2		1.01787	1.0069	1.05442	2.719e-06	1.088e-05	6.6416	6.7246	6.5771	6.6575	6.7487	6.951	7.0459	7.0904	7.0191	7.0653	7.0249				map01100;map00760;map00650;map00330;map00250;map00410	14.58	1956-12-02	Metabolic pathways;Nicotinate and nicotinamide metabolism;Butanoate metabolism;Arginine and proline metabolism;Alanine, aspartate and glutamate metabolism;beta-Alanine metabolism	Carboxylic acids and derivatives	Global and overview maps;Metabolism of cofactors and vitamins;Carbohydrate metabolism;Amino acid metabolism;Amino acid metabolism;Metabolism of other amino acids	Metabolism;Metabolism;Metabolism;Metabolism;Metabolism;Metabolism	Peptides;Peptides;Hormones and transmitters	HMDB0000112	Amino acids, peptides, and analogues	pos	C4H9NO2	174.1	Amino acids;Amines;Neurotransmitters	Organic acids and derivatives	C00334
alpha ketoglutaric acid	metab_54	-		1.62184	1.60043	1.19012	1.972e-05	5.26e-05	4.7055	5.0571	4.7324	4.8926	5.3086	5.6988	5.7392	5.9768	5.9705	5.9209	5.96				-	15.229	-	-	-	-	-	-	-	-	pos	-	73.1	-	-	-
ribose	metab_59	-		1.22825	1.22699	1.09727	1.199e-06	5.976e-06	5.5717	5.5147	5.531	5.5579	5.323	5.9961	6.0142	6.119	6.049	5.9751	6.0542				map00030;map02010	16.723	-	Pentose phosphate pathway;ABC transporters	-	Carbohydrate metabolism;Membrane transport	Metabolism;Environmental Information Processing	Carbohydrates;-	-	-	pos	-	103.1	Monosaccharides;-	-	C00121;C08353
trans caftaric acid	metab_60	-		1.24145	1.23986	1.10406	1.185e-06	5.976e-06	5.3244	5.2632	5.2786	5.2973	5.0715	5.7513	5.7488	5.8742	5.8275	5.7352	5.8227				-	16.725	-	-	-	-	-	-	-	-	pos	-	307.2	-	-	-
hypoxanthine	metab_72	C5H4N4O		1.30865	1.31419	1.17602	0.002714	0.004343	4.1107	3.5298	4.6448	4.4553	4.0221	4.9692	4.8776	4.98	4.7907	4.7548	4.9313				map01100;map00230	18.462	68-94-0	Metabolic pathways;Purine metabolism	Imidazopyrimidines	Global and overview maps;Nucleotide metabolism	Metabolism;Metabolism	-	HMDB0000157	Purines and purine derivatives	pos	C5H4N4O	265.1	-	Organoheterocyclic compounds	C00262
citric acid	metab_74	C6H8O7		1.25585	1.24684	1.10811	3.251e-06	1.195e-05	5.0217	5.2215	5.1377	5.2009	5.1778	5.5792	5.6356	5.7829	5.7335	5.6715	5.8489				map01100;map00630;map01110;map01210;map01200;map01230;map00250;map00020	18.657	77-92-9	Metabolic pathways;Glyoxylate and dicarboxylate metabolism;Biosynthesis of secondary metabolites;2-Oxocarboxylic acid metabolism;Carbon metabolism;Biosynthesis of amino acids;Alanine, aspartate and glutamate metabolism;Citrate cycle (TCA cycle)	Carboxylic acids and derivatives	Global and overview maps;Carbohydrate metabolism;Global and overview maps;Global and overview maps;Global and overview maps;Global and overview maps;Amino acid metabolism;Carbohydrate metabolism	Metabolism;Metabolism;Metabolism;Metabolism;Metabolism;Metabolism;Metabolism;Metabolism	Organic acids	HMDB0000094	Tricarboxylic acids and derivatives	pos	C6H8O7	273.1	Carboxylic acids	Organic acids and derivatives	C00158
adenine	metab_78	C5H5N5		1.06059	1.05798	1.07755	1.58e-05	4.475e-05	5.3489	5.2986	5.2598	5.275	5.1214	5.5877	5.6569	5.8041	5.7049	5.6106	5.6515				map01100;map00230;map00908	19.274	73-24-5	Metabolic pathways;Purine metabolism;Zeatin biosynthesis	Imidazopyrimidines	Global and overview maps;Nucleotide metabolism;Metabolism of terpenoids and polyketides	Metabolism;Metabolism;Metabolism	Nucleic acids	HMDB0000034	Purines and purine derivatives	pos	C5H5N5	264.1	Bases	Organoheterocyclic compounds	C00147
L-histidine	metab_79	C6H9N3O2		2.08543	2.08352	0.739877	3.462e-10	1.632e-08	5.7006	5.6912	5.7308	5.711	5.6939	4.039	4.2074	4.3737	4.3001	4.1941	4.2091				map01100;map01110;map00340;map02010;map01230;map00970;map00410	19.277	71-00-1	Metabolic pathways;Biosynthesis of secondary metabolites;Histidine metabolism;ABC transporters;Biosynthesis of amino acids;Aminoacyl-tRNA biosynthesis;beta-Alanine metabolism	Carboxylic acids and derivatives	Global and overview maps;Global and overview maps;Amino acid metabolism;Membrane transport;Global and overview maps;Translation;Metabolism of other amino acids	Metabolism;Metabolism;Metabolism;Environmental Information Processing;Metabolism;Genetic Information Processing;Metabolism	Peptides	HMDB0000177	Amino acids, peptides, and analogues	pos	C6H9N3O2	278.2	Amino acids	Organic acids and derivatives	C00135
psicose	metab_80	-		1.17658	1.16905	0.931599	9.616e-08	9.341e-07	6.9622	6.9393	6.9902	6.9618	6.9437	6.5389	6.3803	6.56	6.4665	6.5086	6.4408				-	19.377	-	-	-	-	-	-	-	-	pos	-	307.2	-	-	-
4,8-dihydroxyquinoline-2-carboxylic acid	metab_81	C10H7NO4		1.31789	1.31021	0.861789	1.342e-08	2.607e-07	4.2975	4.2915	4.349	4.3006	4.2874	3.7799	3.6242	3.7627	3.6375	3.7416	3.7121				map00380	19.382	59-00-7	Tryptophan metabolism	Quinolines and derivatives	Amino acid metabolism	Metabolism	-	HMDB0000881	Quinoline carboxylic acids	pos	C10H7NO4	492.3	-	Organoheterocyclic compounds	C02470
L-sorbose	metab_82	C6H12O6		1.21079	1.20124	0.925491	3.979e-07	2.848e-06	6.7129	6.816	6.8816	6.8421	6.8365	6.3635	6.2286	6.3823	6.2702	6.3586	6.2549				map00051;map00052	19.498	87-79-6	Fructose and mannose metabolism;Galactose metabolism	Organooxygen compounds	Carbohydrate metabolism;Carbohydrate metabolism	Metabolism;Metabolism	Carbohydrates	HMDB0001266	Carbohydrates and carbohydrate conjugates	pos	C6H12O6	307.2	Monosaccharides	Organic oxygen compounds	C00795;C00247
3-methyl-L-histidine	metab_83	-		1.03287	1.02286	1.08839	1.739e-05	4.729e-05	4.2771	4.2996	4.313	4.3052	4.4136	4.604	4.6427	4.8644	4.7088	4.7321	4.6705				map00340	19.516	-	Histidine metabolism	-	Amino acid metabolism	Metabolism	-	-	-	pos	-	81.1	-	-	C01152
beta-ionone	metab_84	C13H20O		1.22052	1.24807	0.894664	0.02529	0.03339	7.176	7.1733	7.1785	7.1912	7.1678	6.8887	6.8274	5.6832	5.5485	6.8167	6.7588				-	19.553	79-77-6	-	Prenol lipids	-	-	-	HMDB0036565	Sesquiterpenoids	pos	C13H20O	319.2	-	Lipids and lipid-like molecules	C12287
galactosamine	metab_85	-		1.04895	1.0394	0.947691	3.051e-08	4.15e-07	7.1765	7.1816	7.2041	7.2061	7.1734	6.8917	6.8225	6.7775	6.7982	6.8186	6.7609				-	19.609	7535-00-4	-	-	-	-	-	-	-	pos	-	319.2	-	-	-
D-glucose	metab_86	C6H12O6		1.05111	1.04167	0.947412	3.628e-08	4.486e-07	7.1763	7.1823	7.2039	7.2062	7.1735	6.8918	6.8249	6.7701	6.7975	6.8139	6.7609				map01100;map01110;map02010;map00520;map01200;map00051;map00901;map00052;map00010;map00500;map00030;map04933	19.711	50-99-7	Metabolic pathways;Biosynthesis of secondary metabolites;ABC transporters;Amino sugar and nucleotide sugar metabolism;Carbon metabolism;Fructose and mannose metabolism;Indole alkaloid biosynthesis;Galactose metabolism;Glycolysis / Gluconeogenesis;Starch and sucrose metabolism;Pentose phosphate pathway;AGE-RAGE signaling pathway in diabetic complications	Organooxygen compounds	Global and overview maps;Global and overview maps;Membrane transport;Carbohydrate metabolism;Global and overview maps;Carbohydrate metabolism;Biosynthesis of other secondary metabolites;Carbohydrate metabolism;Carbohydrate metabolism;Carbohydrate metabolism;Carbohydrate metabolism;Endocrine and metabolic diseases	Metabolism;Metabolism;Environmental Information Processing;Metabolism;Metabolism;Metabolism;Metabolism;Metabolism;Metabolism;Metabolism;Metabolism;Human Diseases	-;Carbohydrates;-	HMDB0000122	Carbohydrates and carbohydrate conjugates	pos	C6H12O6	319.2	-;Monosaccharides;-	Organic oxygen compounds	C00267;C00031;C00221
talose	metab_88	-		1.22643	1.2141	0.923031	1.11e-08	2.515e-07	6.6176	6.6713	6.6638	6.6917	6.617	6.2238	6.1355	6.0835	6.1117	6.1678	6.1161				-	19.943	-	-	-	-	-	-	-	-	pos	-	319.2	-	-	-
L-lysine	metab_89	C6H14N2O2		1.22193	1.21694	1.1068	1.921e-07	1.705e-06	4.9344	4.8817	4.889	4.8584	4.7805	5.3217	5.3426	5.4868	5.4481	5.3675	5.3686				map01100;map00310;map01110;map00300;map01210;map00780;map02010;map01230;map00970;map00960	20.012	56-87-1	Metabolic pathways;Lysine degradation;Biosynthesis of secondary metabolites;Lysine biosynthesis;2-Oxocarboxylic acid metabolism;Biotin metabolism;ABC transporters;Biosynthesis of amino acids;Aminoacyl-tRNA biosynthesis;Tropane, piperidine and pyridine alkaloid biosynthesis	Carboxylic acids and derivatives	Global and overview maps;Amino acid metabolism;Global and overview maps;Amino acid metabolism;Global and overview maps;Metabolism of cofactors and vitamins;Membrane transport;Global and overview maps;Translation;Biosynthesis of other secondary metabolites	Metabolism;Metabolism;Metabolism;Metabolism;Metabolism;Metabolism;Environmental Information Processing;Metabolism;Genetic Information Processing;Metabolism	Peptides	HMDB0000182	Amino acids, peptides, and analogues	pos	C6H14N2O2	317.1	Amino acids	Organic acids and derivatives	C00047
Methyl Caprate	metab_90	-		1.09487	1.11387	0.885981	0.01556	0.02182	5.2119	5.1748	5.0332	4.8848	4.91	5.2744	4.2797	4.4486	4.2444	4.383	4.176				-	20.077	-	-	-	-	-	-	-	-	pos	-	74.1	-	-	-
tyrosine	metab_92	C9H11NO3		1.16662	1.16016	1.09096	2.444e-08	3.694e-07	5.1548	5.1484	5.142	5.184	5.151	5.5626	5.6157	5.7225	5.5846	5.6499	5.6146				map01100;map01110;map00350;map00730;map00130;map01210;map01230;map00966;map00950;map00460;map00940;map00360;map00970;map00261;map00400	20.208	60-18-4	Metabolic pathways;Biosynthesis of secondary metabolites;Tyrosine metabolism;Thiamine metabolism;Ubiquinone and other terpenoid-quinone biosynthesis;2-Oxocarboxylic acid metabolism;Biosynthesis of amino acids;Glucosinolate biosynthesis;Isoquinoline alkaloid biosynthesis;Cyanoamino acid metabolism;Phenylpropanoid biosynthesis;Phenylalanine metabolism;Aminoacyl-tRNA biosynthesis;Monobactam biosynth…	Carboxylic acids and derivatives	Global and overview maps;Global and overview maps;Amino acid metabolism;Metabolism of cofactors and vitamins;Metabolism of cofactors and vitamins;Global and overview maps;Global and overview maps;Biosynthesis of other secondary metabolites;Biosynthesis of other secondary metabolites;Metabolism of other amino acids;Biosynthesis of other secondary metabolites;Amino acid metabolism;Translation;Biosy…	Metabolism;Metabolism;Metabolism;Metabolism;Metabolism;Metabolism;Metabolism;Metabolism;Metabolism;Metabolism;Metabolism;Metabolism;Genetic Information Processing;Metabolism;Metabolism	Peptides	HMDB0000158	Amino acids, peptides, and analogues	pos	C9H11NO3	218.1	Amino acids	Organic acids and derivatives	C00082
gluconic acid	metab_95	C6H12O7		1.96448	1.94406	1.27237	1.943e-08	3.304e-07	4.7336	4.7548	4.7514	4.836	5.0617	6.0924	6.0404	6.2911	6.1648	6.0464	6.2244				map01100;map00030;map01110;map01200	20.976	526-95-4;133-42-6	Metabolic pathways;Pentose phosphate pathway;Biosynthesis of secondary metabolites;Carbon metabolism	Organooxygen compounds	Global and overview maps;Carbohydrate metabolism;Global and overview maps;Global and overview maps	Metabolism;Metabolism;Metabolism;Metabolism	Carbohydrates	HMDB0000625	Carbohydrates and carbohydrate conjugates	pos	C6H12O7	333.2	Monosaccharides	Organic oxygen compounds	C00257
D-saccharic acid	metab_98	-		1.16667	1.14962	1.12408	0.0001941	0.000394	4.0271	4.3533	3.899	3.9532	4.1959	4.5796	4.4866	4.7093	4.5178	4.6258	4.6389				map01100;map00053	21.488	-	Metabolic pathways;Ascorbate and aldarate metabolism	-	Global and overview maps;Carbohydrate metabolism	Metabolism;Metabolism	-	-	-	pos	-	174.1	-	-	C00818
uric acid	metab_103	C5H4N4O3		1.31828	1.29985	1.15105	7.827e-06	2.475e-05	4.0514	3.8785	3.9628	4.0812	4.2496	4.6057	4.615	4.6285	4.6532	4.6154	4.8192				map01100;map00230	22.12	69-93-2	Metabolic pathways;Purine metabolism	Imidazopyrimidines	Global and overview maps;Nucleotide metabolism	Metabolism;Metabolism	-	HMDB0000289	Purines and purine derivatives	pos	C5H4N4O3	456.2	-	Organoheterocyclic compounds	C00366
benzaldehyde	metab_105	C7H6O		1.34515	1.34546	1.27601	0.01591	0.02208	2.1966	3.4488	3.3508	3.4739	3.5812	3.8018	3.694	3.6748	4.3109	4.4956	4.5966				-	22.189	100-52-7	-	Benzene and substituted derivatives	-	-	-	HMDB0006115	Benzoyl derivatives	pos	C7H6O	279.2	-	Benzenoids	C00261
Cannabinol	metab_109	C21H26O2		2.43885	2.43048	1.86405	2.253e-07	1.803e-06	2.3062	2.246	2.9798	2.2358	2.2201	4.434	4.2598	4.5061	4.3442	4.5969	4.6771				-	23.223	521-35-7	-	-	-	-	-	LMPK13120002	-	pos	C21H26O2	367.2	-	-	C07580
kestose	metab_124	-		1.4119	1.42762	1.22043	4.867e-05	0.0001204	3.3748	3.3655	3.3595	3.3148	3.2792	4.1382	4.4135	3.8429	4.2077	3.9946	3.8505				-	27.133	-	-	-	-	-	-	-	-	pos	-	361.2	-	-	-
eicosapentaenoic acid	metab_128	C20H30O2		1.93638	1.91808	0.783192	2.475e-06	1.02e-05	6.0957	6.0389	6.08	6.0363	5.9163	4.509	4.515	4.4794	4.8266	5.1524	4.8691				map01040	27.778	10417-94-4	Biosynthesis of unsaturated fatty acids	Fatty Acyls	Lipid metabolism	Metabolism	Lipids	HMDB0001999	Fatty acids and conjugates	pos	C20H30O2	361.2	Fatty acids	Lipids and lipid-like molecules	C06428
behenic acid	metab_137	C22H44O2		1.00852	0.999912	1.08942	5.107e-06	1.781e-05	4.1281	3.9937	4.0265	3.9842	4	4.288	4.3625	4.468	4.4068	4.3543	4.4337				map00073;map01040	31.316	112-85-6	Cutin, suberine and wax biosynthesis;Biosynthesis of unsaturated fatty acids	Fatty Acyls	Lipid metabolism;Lipid metabolism	Metabolism;Metabolism	Lipids	HMDB0000944;LMFA01010022	Fatty acids and conjugates	pos	C22H44O2	453.2	Fatty acids	Lipids and lipid-like molecules	C08281
2-ethyltoluene	metab_139	-		1.10985	1.09839	1.09481	5.41e-06	1.839e-05	4.6256	4.5941	4.4726	4.5169	4.6242	4.867	4.9548	5.078	5.0688	4.9933	5.039				-	32.364	-	-	-	-	-	-	-	-	pos	-	207.1	-	-	C14572
