# Supplementary material for: Transcriptome and metabolome analyses reveal that Bacillus subtilis BS-Z15 lipopeptides mycosubtilin homologue mediates plant defense responses
Source: Front Plant Sci. 2023 Feb 6;13:1088220. doi: 10.3389/fpls.2022.1088220 (PMC9940755; doi:10.3389/fpls.2022.1088220)
Supplement: Supplementary file 13 [file Table_11.xls]

## Sheet: Supplementary Table 11
pathway ID	Description	B_vs_A Number	B_vs_A Metabolites
map00010	Glycolysis / Gluconeogenesis	2	C00031;C00267;C00221;C00022
map00020	Citrate cycle (TCA cycle)	3	C00042;C00158;C00022
map00030	Pentose phosphate pathway	4	C00121;C00031;C00257;C00221;C00022
map00040	Pentose and glucuronate interconversions	1	C00022
map00051	Fructose and mannose metabolism	2	C00267;C00247
map00052	Galactose metabolism	2	C00795;C00267;C00031
map00053	Ascorbate and aldarate metabolism	2	C00818;C00022
map00071	Fatty acid degradation	1	C03547
map00073	Cutin, suberine and wax biosynthesis	1	C08281
map00130	Ubiquinone and other terpenoid-quinone biosynthesis	1	C00082
map00190	Oxidative phosphorylation	1	C00042
map00220	Arginine biosynthesis	1	C00025
map00230	Purine metabolism	3	C00366;C00262;C00147
map00250	Alanine, aspartate and glutamate metabolism	5	C00025;C00042;C00334;C00158;C00022
map00260	Glycine, serine and threonine metabolism	2	C05519;C00022
map00261	Monobactam biosynthesis	2	C00082;C00022
map00270	Cysteine and methionine metabolism	1	C00022
map00280	Valine, leucine and isoleucine degradation	2	C00141;C00183
map00290	Valine, leucine and isoleucine biosynthesis	4	C02226;C00141;C00183;C00022
map00300	Lysine biosynthesis	1	C00047
map00310	Lysine degradation	1	C00047
map00330	Arginine and proline metabolism	3	C00025;C00334;C00022
map00340	Histidine metabolism	3	C00025;C00135;C01152
map00350	Tyrosine metabolism	3	C00042;C00082;C00022
map00360	Phenylalanine metabolism	4	C00042;C00082;C02137;C00022
map00380	Tryptophan metabolism	1	C02470
map00400	Phenylalanine, tyrosine and tryptophan biosynthesis	1	C00082
map00410	beta-Alanine metabolism	2	C00135;C00334
map00430	Taurine and hypotaurine metabolism	2	C00025;C00022
map00440	Phosphonate and phosphinate metabolism	1	C00022
map00460	Cyanoamino acid metabolism	3	C00183;C00302;C00082
map00480	Glutathione metabolism	1	C00025
map00500	Starch and sucrose metabolism	1	C00031
map00520	Amino sugar and nucleotide sugar metabolism	1	C00267;C00031
map00620	Pyruvate metabolism	2	C00042;C00022
map00630	Glyoxylate and dicarboxylate metabolism	6	C00025;C00158;C00022;C00042;C00209;C00160
map00640	Propanoate metabolism	1	C00042
map00650	Butanoate metabolism	5	C00025;C00042;C00497;C00334;C00022
map00660	C5-Branched dibasic acid metabolism	3	C00025;C02226;C00022
map00710	Carbon fixation in photosynthetic organisms	1	C00022
map00730	Thiamine metabolism	2	C00082;C00022
map00760	Nicotinate and nicotinamide metabolism	3	C00042;C00334;C00022
map00770	Pantothenate and CoA biosynthesis	3	C00141;C00183;C00022
map00780	Biotin metabolism	1	C00047
map00860	Porphyrin and chlorophyll metabolism	1	C00025
map00900	Terpenoid backbone biosynthesis	1	C00022
map00901	Indole alkaloid biosynthesis	1	C00031
map00908	Zeatin biosynthesis	1	C00147
map00910	Nitrogen metabolism	1	C00025
map00920	Sulfur metabolism	1	C00042
map00940	Phenylpropanoid biosynthesis	2	C05627;C00082
map00950	Isoquinoline alkaloid biosynthesis	1	C00082
map00960	Tropane, piperidine and pyridine alkaloid biosynthesis	1	C00047
map00966	Glucosinolate biosynthesis	3	C00141;C00183;C00082
map00970	Aminoacyl-tRNA biosynthesis	5	C00025;C00135;C00047;C00183;C00082
map01040	Biosynthesis of unsaturated fatty acids	2	C08281;C06428
map01100	Metabolic pathways	21	C00025;C00366;C00022;C00141;C00147;C00257;C00047;C02226;C00209;C00158;C00031;C00135;C05519;C00334;C00217;C00818;C06588;C00082;C00221;C00262;C00267;C00042;C00160;C00183
map01110	Biosynthesis of secondary metabolites	12	C00025;C00158;C00082;C00221;C00022;C00257;C00135;C00141;C00267;C00042;C00160;C00047;C00183;C00031
map01200	Carbon metabolism	7	C00025;C00158;C00257;C00221;C00022;C00267;C00042;C00160
map01210	2-Oxocarboxylic acid metabolism	8	C00025;C00158;C00082;C00022;C00141;C00047;C02226;C00183
map01230	Biosynthesis of amino acids	8	C00025;C00158;C00082;C00022;C00135;C00141;C00047;C00183
map01502	Vancomycin resistance	1	C00022
map02010	ABC transporters	6	C00025;C00121;C00031;C00135;C00047;C00183
map04933	AGE-RAGE signaling pathway in diabetic complications	1	C00031
