# Supplementary material for: Transcriptome and metabolome analyses reveal that Bacillus subtilis BS-Z15 lipopeptides mycosubtilin homologue mediates plant defense responses
Source: Front Plant Sci. 2023 Feb 6;13:1088220. doi: 10.3389/fpls.2022.1088220 (PMC9940755; doi:10.3389/fpls.2022.1088220)
Supplement: Supplementary file 14 [file Table_12.xls]

## Sheet: Supplementary Table 12
Metabolite	VIP_value	P_value	B_1	B_2	B_3	B_4	B_5	B_6	A_1	A_2	A_3	A_4	A_5	A_6
beta-ionone	1.2729	0.01409	0.1533	0.0473	-1.9287	-2.1613	0.0289	-0.0711	0.6725	0.6495	0.6448	0.6538	0.6758	0.6352
4,8-dihydroxyquinoline-2-carboxylic acid	1.3064	1.607e-08	-0.7274	-1.1984	-0.7795	-1.158	-0.8431	-0.9325	1.3306	0.8384	0.8202	0.9941	0.8478	0.8078
talose	1.2293	4.066e-08	-0.6449	-0.951	-1.1311	-1.0333	-0.8391	-1.0179	1.4191	0.7195	0.9055	0.8796	0.9761	0.7174
L-histidine	2.0363	4.178e-11	-1.1819	-0.9688	-0.7583	-0.8514	-0.9855	-0.9666	1.0759	0.9211	0.9092	0.9594	0.9343	0.9126
eicosapentaenoic acid	1.8996	4.121e-07	-1.2248	-1.2163	-1.2659	-0.7824	-0.3287	-0.7232	1.0489	0.9852	0.9061	0.9633	0.9024	0.7354
3-methyl-2-oxobutanoic acid	2.7636	4.064e-07	0.8499	0.8843	0.9096	1.0029	0.8818	1.0134	-0.1538	-0.9427	-1.0906	-1.1405	-1.1526	-1.0618
Cannabinol	2.2943	1.671e-06	0.8787	0.7143	0.9468	0.794	1.0325	1.1082	-0.2541	-1.1303	-1.1872	-0.4943	-1.1969	-1.2116
hypoxanthine	1.3785	0.001143	0.9481	0.7711	0.969	0.6032	0.5338	0.8748	-1.5511	-0.7107	-1.8329	0.3214	-0.0449	-0.8818
benzaldehyde	1.405	0.006527	0.2806	0.1256	0.098	1.0127	1.2783	1.4236	-1.3686	-2.0278	-0.227	-0.368	-0.1908	-0.0367
2,3-butanediol	1.2705	1.381e-07	0.492	0.892	1.2894	1.0429	0.6591	1.2063	-1.0561	-0.7001	-1.0695	-1.055	-0.9338	-0.767
benzoylformic acid	1.2216	2.071e-08	0.7289	0.877	1.2246	0.9431	0.8733	0.9864	-1.2648	-0.627	-0.9353	-0.7852	-1.1658	-0.8551
glycylproline	1.3275	4.985e-07	0.5205	0.7536	1.3043	0.9357	0.8531	1.1662	-0.7925	-0.6686	-0.6537	-1.069	-0.9605	-1.3889
trans caftaric acid	1.2542	3.251e-07	0.7879	0.7798	1.1896	1.0368	0.7354	1.0213	-1.2525	-0.6066	-0.8066	-0.7565	-0.6953	-1.4332
ribose	1.2405	3.279e-07	0.7966	0.8571	1.2067	0.9732	0.7266	0.9904	-1.2519	-0.6193	-0.8095	-0.7553	-0.6654	-1.449
N-methylalanine	1.1977	1.308e-06	0.7476	0.8155	1.0681	0.9197	0.9733	0.9634	-1.4233	-0.6883	-0.3264	-0.6463	-1.2351	-1.1682
biphenyl	1.2867	6.602e-07	0.7348	0.8311	1.131	0.8571	0.7774	1.1893	-1.4425	-0.8514	-0.4104	-0.9058	-1.1966	-0.7142
2-hydroxypyridine	1.284	7.936e-07	0.7387	0.8076	1.123	0.879	0.7515	1.2126	-1.45	-0.8449	-0.4076	-0.892	-1.1997	-0.7182
L-glutamic acid	1.2203	6.889e-06	0.6287	0.6676	1.1879	1.1248	0.8607	0.9145	-1.7551	-0.8288	-0.4986	-0.9994	-0.7979	-0.5042
L-allothreonine	1.3352	1.571e-06	0.7987	0.7639	1.0493	0.8502	1.064	0.9517	-1.7774	-0.8477	-0.7288	-0.6715	-0.6939	-0.7586
L-lysine	1.2435	1.975e-06	0.6942	0.7615	1.224	1.0996	0.8411	0.8448	-1.6749	-0.5476	-0.7168	-0.6932	-0.7914	-1.0412
picolonic acid	1.6469	5.968e-07	1.0054	0.7888	1.0334	0.664	0.8647	1.1692	-0.7317	-1.2403	-0.8185	-1.4803	-0.7314	-0.5233
gluconic acid	1.9322	1.933e-09	0.8734	0.799	1.157	0.9767	0.8077	1.0618	-1.0126	-1.0667	-1.0364	-1.0413	-0.9204	-0.5982
citraconic acid	1.8554	3.746e-09	0.9047	0.9702	1.1669	0.8692	0.7938	0.961	-1.3557	-0.9405	-0.8196	-0.7796	-0.8686	-0.9017
uric acid	1.3292	1.4e-05	0.7545	0.7793	0.8148	0.8801	0.7803	1.3189	-1.6853	-0.7108	-1.1678	-0.9451	-0.632	-0.1869
alpha ketoglutaric acid	1.6321	1.258e-05	0.5747	0.6458	1.0638	1.0527	0.9655	1.0343	-1.5285	-1.1729	-0.5543	-1.1256	-0.8437	-0.1118
succinic acid	1.3157	6.346e-06	0.9484	0.7413	0.775	0.7443	0.8636	1.3175	-1.5261	-1.3049	-0.3111	-1.0089	-0.602	-0.6371
citric acid	1.2677	1.059e-06	0.5088	0.6863	1.1505	0.9948	0.7994	1.3585	-1.3083	-1.2485	-0.6188	-0.8828	-0.6835	-0.7565
kestose	1.4089	7.157e-05	0.993	1.568	0.3764	1.1381	0.6933	0.3924	-1.7801	-0.6009	-0.6205	-0.633	-0.7262	-0.8006
pyruvic acid	1.2578	0.0008832	0.8581	0.7775	0.8751	0.7888	0.7248	0.7317	-1.6678	-1.4278	-0.5476	-1.1974	-0.5291	0.6136
D-saccharic acid	1.1943	0.000509	0.7745	0.5226	1.1258	0.6072	0.8998	0.9351	-2.0482	-0.7221	0.1616	-1.0692	-0.9224	-0.2649
